# Supplementary material for: Development of visual motion integration involves coordination of multiple cortical stages
Source: eLife. 2021 Mar 22;10:e59798. doi: 10.7554/eLife.59798 (PMC7984838; doi:10.7554/eLife.59798)
Supplement: Figure 2—source data 1. [file elife-59798-fig2-data1.xlsx]

## Sheet: Figure 2A
Age	mean PI	Neurons
139	-3.25204	2
359	3.56175	4
411	0.447294	6
443	1.22897	9
448	-5.09811	5
143	0.876527	4
100	2.8895	12
128	-0.135332	3
135	-1.58905	1
37	2.07929	7
37	1.39149	2
37	2.08984	3
37	2.92694	5
37	5.09049	16
38	1.22927	3
38	2.29327	9
38	2.19411	2
38	1.2532	12
38	2.50419	3
38	3.44732	3
38	3.3068	13
38	6.52438	11
39	3.42974	3
39	3.28769	7
39	5.16843	6
39	3.77116	3
39	5.50834	6
39	6.53146	1
40	1.5722	1
40	2.09053	12
40	1.32284	10
40	1.84159	6
40	2.41563	5
40	2.05234	11
40	3.45499	10
40	5.39822	2
41	3.2825	7
42	3.07661	6
42	4.23771	2
42	5.24176	10
42	6.59717	10
43	2.6805	5
45	5.52987	10
45	4.86221	1
45	5.76419	3
45	4.54568	7
46	4.47363	1
46	5.79163	1
46	5.56597	1

## Sheet: Figure 2B-C, Figure 2S1, 5S1
P37-40				P41-47				Adult
Zp	Zc	Pattern Index		Zp	Zc	Pattern Index		Zp	Zc	Pattern Index
2.41563	6.53472	-4.11909		15.9573	-0.668954	15.9573		2.9437	3.93802	-0.994326
0.280967	14.9915	-14.7106		8.73306	5.80016	2.9329		4.89221	10.402	-5.50975
2.24629	7.99646	-5.75017		5.64455	6.63519	-0.99064		2.77125	10.8084	-8.03713
-0.637782	19.1075	-19.1075		5.37437	7.07628	-1.7019		18.095	1.23153	16.8635
5.2573	6.29281	-1.03551		5.00997	3.58288	1.42709		11.8798	4.86297	7.0168
10.6377	2.93085	7.70683		5.48739	7.11858	-1.63119		4.83101	6.42719	-1.59618
3.52366	7.43053	-3.90687		4.86221	4.86786	-0.00564623		7.12429	4.73959	2.3847
-2.84578	14.6255	-14.6255		4.44747	9.94477	-5.4973		0.67583	6.38372	-5.70789
0.314433	17.1357	-16.8213		3.98295	10.6339	-6.65092		4.20508	8.27558	-4.0705
3.43644	13.0608	-9.62438		-0.33686	11.8332	-11.8332		9.94709	2.85095	7.09615
3.58324	7.1754	-3.59217		4.54568	7.12985	-2.58417		7.50129	4.82915	2.67214
2.11087	10.0219	-7.91106		10.5574	3.48234	7.07506		4.80957	4.50039	0.309177
-0.263545	11.6137	-11.6137		-0.218686	8.80663	-8.80663		5.40605	4.13906	1.26699
5.8792	6.16012	-0.280918		3.55136	0.281308	3.27006		6.15204	3.48574	2.66629
0.811132	9.93808	-9.12695		13.9525	2.56773	11.3848		7.53519	6.69894	0.836252
2.14193	7.67565	-5.53372		12.6545	3.44908	9.20544		17.8013	1.32146	16.4798
2.73814	8.35677	-5.61863		11.7765	2.1944	9.58215		5.22581	8.39707	-3.17126
6.07005	5.49737	0.572676		13.9298	-0.156323	13.9298		2.95639	10.5448	-7.58842
4.94663	8.32735	-3.38072		4.15501	2.66073	1.49429		4.89682	10.1109	-5.2141
1.2532	7.12414	-5.87094		4.93922	7.82491	-2.88568		8.29453	6.27095	2.02358
-0.657929	13.4126	-13.4126		2.76914	6.94234	-4.1732		9.00412	5.24259	3.76153
0.644135	11.1496	-10.5054		7.20362	9.00974	-1.80612		2.878	6.8768	-3.9988
1.34625	8.95198	-7.60573		4.75063	4.81355	-0.0629161		0.811924	13.2284	-12.4165
2.03316	9.7388	-7.70565		4.19664	5.10266	-0.906021		6.51067	3.2843	3.22637
1.85501	10.4891	-8.63406		3.66851	2.6445	1.02401		3.59948	6.22821	-2.62874
1.43672	9.82481	-8.38809		12.2214	2.81309	9.40835		-0.834238	9.67286	-9.67286
4.38251	5.38691	-1.0044		3.2253	7.94135	-4.71605		7.80967	5.61936	2.19031
-0.344245	10.2236	-10.2236		11.3774	2.28736	9.09003		2.32936	4.60629	-2.27692
10.2221	2.4113	7.81077		5.76419	4.69976	1.06443		6.41896	2.96344	3.45552
-2.89189	11.6211	-11.6211		8.79647	3.24829	5.54819		5.37842	5.2412	0.137211
2.60197	13.9825	-11.3805		3.62219	8.75338	-5.1312		12.2237	3.03242	9.19133
3.19517	5.95262	-2.75745		2.96167	14.1498	-11.1881		6.64602	7.2884	-0.642379
5.73531	3.5789	2.15641		20.1183	0.133484	19.9848		4.41793	5.76273	-1.3448
1.86805	3.58487	-1.71681		6.87031	5.29034	1.57997		9.76484	4.3802	5.38464
3.38021	11.7813	-8.40112		6.59572	4.16065	2.43507		12.4851	1.60681	10.8783
5.98504	5.94188	0.0431602		9.3426	4.49927	4.84333		10.8308	3.9138	6.91701
1.36459	8.60678	-7.24219		3.81037	8.30734	-4.49697		4.78398	10.9301	-6.14614
3.97039	3.93936	0.0310319		5.00855	3.44244	1.56611		6.61083	7.92101	-1.31018
0.599334	9.18804	-8.5887		2.54415	3.59731	-1.05317		7.29984	6.08486	1.21498
3.99245	7.47026	-3.47782		6.22425	4.31046	1.91379		12.0967	3.15808	8.93863
10.8095	3.80789	7.00161		0.820214	1.90206	-1.08185		8.99544	5.92929	3.06615
2.23926	3.94637	-1.70711		8.44273	3.31166	5.13106		5.71548	7.18899	-1.47351
7.96769	4.27792	3.68977		2.37034	7.07414	-4.70379		7.52414	1.29426	6.22988
8.0324	5.12079	2.91161		2.48066	15.0979	-12.6172		1.2335	7.20557	-5.97207
1.14106	7.3581	-6.21704		6.1456	5.45135	0.694244		2.2818	2.9456	-0.663798
5.16843	7.32542	-2.15699		10.5155	3.46906	7.04642		2.50485	4.0939	-1.58905
1.19081	7.55536	-6.36455		5.52987	13.4892	-7.9593
7.03277	5.38286	1.6499		2.23524	13.1018	-10.8665
1.52797	13.2061	-11.6782		5.63397	8.1749	-2.54093
7.35839	6.21675	1.14164		5.79163	5.80669	-0.0150692
3.0385	9.62589	-6.58738		9.96392	4.5956	5.36832
8.92489	2.53234	6.39254		4.18268	11.1609	-6.97823
3.57425	9.5321	-5.95785		4.23771	5.22001	-0.982296
5.51229	8.42898	-2.91669		7.39417	4.00052	3.39365
2.67505	8.70134	-6.02629		4.89676	4.78665	0.110108
2.09703	8.64584	-6.54882		10.5348	5.68099	4.85378
3.46071	3.95785	-0.497146		4.67928	8.07684	-3.39756
3.28277	6.84329	-3.56051		5.24176	4.70849	0.533272
2.85629	5.19002	-2.33374		1.94941	7.05555	-5.10615
3.3068	4.03129	-0.724489		7.53419	5.76846	1.76574
2.30404	8.29633	-5.99229		6.59717	3.52307	3.0741
4.06742	7.87201	-3.80459		2.04034	3.42045	-1.38011
1.11809	11.3716	-10.2535		10.1382	1.76695	8.37126
2.54682	7.02608	-4.47926		0.625196	7.41936	-6.79417
0.834148	10.1099	-9.27575		5.55853	5.38436	0.174173
5.24287	8.50516	-3.26229		8.19245	4.76346	3.42898
-0.862241	14.0383	-14.0383		4.0654	5.4195	-1.3541
0.798213	14.7824	-13.9842		3.30147	10.8703	-7.56879
4.54915	9.3297	-4.78054		3.74359	5.44803	-1.70443
1.87702	13.0366	-11.1595		0.841006	12.8211	-11.9801
3.77116	5.22173	-1.45058		2.85175	5.87547	-3.02371
5.12474	7.798	-2.67326		0.8761	7.04795	-6.17185
0.502971	11.1259	-10.6229		1.50426	7.18397	-5.67972
4.47358	5.77729	-1.30371		2.93969	4.3225	-1.38281
4.0861	6.53614	-2.45005		2.085	9.077	-6.992
3.45499	7.3204	-3.86541		1.43766	8.02629	-6.58863
1.27955	7.28893	-6.00937		2.10859	7.35126	-5.24267
1.12223	5.63243	-4.5102		5.18335	3.66179	1.52156
3.52666	3.44939	0.0772679		4.71257	12.7035	-7.99091
1.48172	10.5096	-9.02783		2.42131	10.0177	-7.59643
12.7081	2.45755	10.2506		-0.0625354	13.2607	-13.2607
6.53146	5.37425	1.15721		7.38085	5.22905	2.15181
4.24105	5.19422	-0.953165		7.16241	3.87999	3.28242
10.0459	4.06712	5.97882		3.2825	4.16973	-0.887225
6.19351	4.84085	1.35265
1.78729	8.43062	-6.64333
3.20777	8.7708	-5.56303
4.36448	4.91684	-0.552359
0.675034	9.21313	-8.5381
8.53955	3.42002	5.11953
3.65171	7.1912	-3.53949
1.61716	13.0023	-11.3851
2.33572	6.82747	-4.49175
1.84159	6.84367	-5.00208
-0.336045	8.03376	-8.03376
3.57351	3.61944	-0.0459299
2.29327	11.3842	-9.09096
3.44732	7.88291	-4.43559
1.42672	8.46729	-7.04057
2.73798	8.41596	-5.67799
8.96343	2.9199	6.04353
1.4165	4.61127	-3.19477
4.93571	8.96203	-4.02632
6.07893	5.84309	0.235841
-0.764804	14.5326	-14.5326
0.17748	11.3476	-11.1702
2.97323	5.52326	-2.55003
1.5722	10.4628	-8.89063
4.10175	10.9617	-6.85994
1.98337	4.87645	-2.89309
1.74545	14.3042	-12.5588
2.80427	11.1945	-8.39022
-1.44148	11.6689	-11.6689
-1.7374	15.7152	-15.7152
0.71309	8.44497	-7.73188
-2.23039	15.0806	-15.0806
4.2037	9.37414	-5.17044
2.0341	8.23697	-6.20287
0.212523	8.9137	-8.70118
-0.329022	10.7306	-10.7306
5.81086	4.40187	1.409
2.26576	10.7035	-8.4377
2.14559	7.90435	-5.75876
4.19287	6.37607	-2.1832
-0.603211	15.6723	-15.6723
9.29501	2.84179	6.45322
0.839178	9.28757	-8.4484
6.85924	7.86566	-1.00642
0.812407	12.59	-11.7776
3.11465	11.8803	-8.76563
-0.177673	15.2889	-15.2889
6.24392	4.9892	1.25471
1.22142	7.56945	-6.34803
5.21117	5.32336	-0.112187
4.16025	6.93304	-2.7728
1.96554	7.9988	-6.03326
2.73923	12.0511	-9.3119
1.18908	9.61017	-8.42109
8.99189	1.40639	7.5855
2.61599	7.35258	-4.73659
1.32284	8.26382	-6.94098
0.694362	5.83739	-5.14303
1.45795	14.9138	-13.4559
5.39822	3.42646	1.97176
8.01186	4.24576	3.7661
6.90844	7.30994	-0.401496
1.63254	8.07988	-6.44734
12.8605	2.1204	10.7401
1.54121	11.7351	-10.1939
2.07929	10.9941	-8.91482
1.83641	5.77458	-3.93816
2.05234	8.44296	-6.39062
5.23095	2.97293	2.25802

## Sheet: Figure 2E-F
P37-40				P41-47				Adult
Zp	Zc	Pattern Index		Zp	Zc	Pattern Index		Zp	Zc	Pattern Index
-0.581708	0.631121	-0.631121		5.66531	-0.770223	5.66531		0.178933	3.8558	-3.67687
-0.0867902	2.75124	-2.75124		3.87968	1.60436	2.27532		0.709794	4.10557	-3.39578
-0.39149	3.27222	-3.27222		2.85174	2.95291	-0.101162		-0.245082	3.34205	-3.34205
-0.952734	3.99184	-3.99184		1.9249	-0.246905	1.9249		-0.622156	3.3346	-3.3346
-0.408628	1.68807	-1.68807		1.92766	0.147077	1.78058		2.74722	6.05793	-3.31071
-0.742926	3.09545	-3.09545		1.9194	1.22277	0.696626		0.178915	3.40379	-3.22487
0.09021	1.34036	-1.25015		0.965422	1.36094	-0.395519		-0.369774	2.62845	-2.62845
-0.57728	3.22104	-3.22104		3.53023	1.85499	1.67524		0.372498	2.94459	-2.57209
-0.75665	1.25852	-1.25852		2.69016	1.56424	1.12591		0.139375	2.4928	-2.35342
-0.410402	3.57832	-3.57832		3.46123	1.32039	2.14085		0.996553	2.83287	-1.83632
-1.07662	0.291894	-0.291894		0.101075	-0.833291	0.101075		-0.429684	1.78584	-1.78584
0.255666	3.07664	-2.82097		0.295669	0.641556	-0.345886		0.626719	1.89418	-1.26746
				2.03189	0.947205	1.08468		1.78197	2.9375	-1.15554
				2.71563	0.869356	1.84628		0.702424	1.81941	-1.11699
				-0.775427	3.09507	-3.09507		0.0326399	1.03579	-1.00315
				0.385539	3.70632	-3.32078		0.118901	1.07915	-0.96025
				2.99562	3.52112	-0.525493		1.87985	2.66594	-0.786098
				1.16631	2.81142	-1.64511		3.18944	3.54972	-0.360282
				-0.646998	1.91668	-1.91668		2.01521	2.33663	-0.321424
				-0.469557	1.35872	-1.35872		0.609432	0.861288	-0.251856
				1.70983	1.39301	0.31682		2.64192	2.77008	-0.128156
				0.201334	3.4125	-3.21117		4.45807	4.22557	0.2325
				0.575671	2.23254	-1.65687		3.25551	2.86981	0.385699
								2.70507	2.30223	0.402836
								2.41274	1.85852	0.554221
								2.45034	1.87488	0.575458
								1.6566	0.842077	0.814519
								2.41402	1.37143	1.04259
								3.06	1.10518	1.95481
								4.75313	2.69935	2.05378
								3.39032	0.57426	2.81606
								3.54765	-0.5062	3.54765
								3.98323	-0.0658067	3.98323
								4.03136	-0.00412726	4.03136
								6.11904	1.47012	4.64893
