# Supplementary material for: Development of visual motion integration involves coordination of multiple cortical stages
Source: eLife. 2021 Mar 22;10:e59798. doi: 10.7554/eLife.59798 (PMC7984838; doi:10.7554/eLife.59798)
Supplement: Figure 3—source data 1. [file elife-59798-fig3-data1.xlsx]

## Sheet: Figure 3D-E
Zp	Zc	Pattern Index	Age	Visual eperience	Animal ID
-0.764804	14.5326	-14.5326	40	4	1
0.17748	11.3476	-11.1702	40	4	1
2.97323	5.52326	-2.55003	40	4	1
1.5722	10.4628	-8.89063	40	4	1
4.10175	10.9617	-6.85994	40	4	1
0.280967	14.9915	-14.7106	38	6	2
2.24629	7.99646	-5.75017	38	6	2
-0.637782	19.1075	-19.1075	38	6	2
5.2573	6.29281	-1.03551	38	6	2
10.6377	2.93085	7.70683	38	6	2
3.52366	7.43053	-3.90687	38	6	2
-2.84578	14.6255	-14.6255	38	6	2
0.314433	17.1357	-16.8213	38	6	2
3.43644	13.0608	-9.62438	38	6	2
3.58324	7.1754	-3.59217	38	6	2
2.11087	10.0219	-7.91106	38	6	2
-0.263545	11.6137	-11.6137	38	6	2
5.8792	6.16012	-0.280918	38	6	2
0.811132	9.93808	-9.12695	38	6	2
2.14193	7.67565	-5.53372	38	6	2
2.73814	8.35677	-5.61863	38	6	2
1.98337	4.87645	-2.89309	38	4	3
1.74545	14.3042	-12.5588	38	4	3
2.80427	11.1945	-8.39022	38	4	3
-1.44148	11.6689	-11.6689	38	4	3
-1.7374	15.7152	-15.7152	38	4	3
0.71309	8.44497	-7.73188	38	4	3
3.77116	5.22173	-1.45058	39	5	4
6.07005	5.49737	0.572676	39	6	5
4.94663	8.32735	-3.38072	39	6	5
5.12474	7.798	-2.67326	40	5	6
0.502971	11.1259	-10.6229	40	5	6
4.47358	5.77729	-1.30371	40	5	6
4.0861	6.53614	-2.45005	40	5	6
3.45499	7.3204	-3.86541	40	5	6
1.27955	7.28893	-6.00937	40	5	6
1.12223	5.63243	-4.5102	40	5	6
1.2532	7.12414	-5.87094	38	6	7
-0.657929	13.4126	-13.4126	37	6	8
0.644135	11.1496	-10.5054	37	6	8
1.34625	8.95198	-7.60573	37	6	8
2.03316	9.7388	-7.70565	37	6	8
1.85501	10.4891	-8.63406	37	6	8
1.43672	9.82481	-8.38809	37	6	8
4.38251	5.38691	-1.0044	37	6	8
-0.344245	10.2236	-10.2236	37	6	8
10.2221	2.4113	7.81077	37	6	8
-2.89189	11.6211	-11.6211	37	6	8
3.52666	3.44939	0.0772679	38	5	9
1.48172	10.5096	-9.02783	38	5	9
2.60197	13.9825	-11.3805	39	6	10
3.19517	5.95262	-2.75745	39	6	10
5.73531	3.5789	2.15641	39	6	10
1.86805	3.58487	-1.71681	39	6	10
3.38021	11.7813	-8.40112	39	6	10
5.98504	5.94188	0.0431602	39	6	10
1.36459	8.60678	-7.24219	39	6	10
3.97039	3.93936	0.0310319	39	6	10
0.599334	9.18804	-8.5887	39	6	10
3.99245	7.47026	-3.47782	39	6	10
12.7081	2.45755	10.2506	39	5	11
6.53146	5.37425	1.15721	39	5	11
4.24105	5.19422	-0.953165	39	5	11
10.0459	4.06712	5.97882	39	5	11
6.19351	4.84085	1.35265	39	5	11
1.78729	8.43062	-6.64333	39	5	12
3.20777	8.7708	-5.56303	39	5	12
4.36448	4.91684	-0.552359	39	5	12
0.675034	9.21313	-8.5381	39	5	12
8.53955	3.42002	5.11953	39	5	12
3.65171	7.1912	-3.53949	39	5	12
1.61716	13.0023	-11.3851	40	5	13
2.33572	6.82747	-4.49175	40	5	13
1.84159	6.84367	-5.00208	40	5	13
10.8095	3.80789	7.00161	38	6	14
2.23926	3.94637	-1.70711	38	6	14
7.96769	4.27792	3.68977	39	6	15
8.0324	5.12079	2.91161	39	6	15
1.14106	7.3581	-6.21704	39	6	15
5.16843	7.32542	-2.15699	39	6	15
1.19081	7.55536	-6.36455	39	6	15
7.03277	5.38286	1.6499	39	6	15
1.52797	13.2061	-11.6782	39	6	15
-0.336045	8.03376	-8.03376	38	5	16
3.57351	3.61944	-0.0459299	38	5	16
2.29327	11.3842	-9.09096	38	5	16
7.35839	6.21675	1.14164	38	6	17
3.0385	9.62589	-6.58738	38	6	17
8.92489	2.53234	6.39254	38	6	17
3.57425	9.5321	-5.95785	38	6	17
5.51229	8.42898	-2.91669	38	6	17
2.67505	8.70134	-6.02629	38	6	17
2.09703	8.64584	-6.54882	38	6	17
3.46071	3.95785	-0.497146	38	6	17
3.28277	6.84329	-3.56051	38	6	17
2.85629	5.19002	-2.33374	38	6	17
3.3068	4.03129	-0.724489	38	6	17
-2.23039	15.0806	-15.0806	37	4	18
4.2037	9.37414	-5.17044	37	4	18
2.0341	8.23697	-6.20287	37	4	18
0.212523	8.9137	-8.70118	37	4	18
-0.329022	10.7306	-10.7306	37	4	18
5.81086	4.40187	1.409	37	4	18
2.26576	10.7035	-8.4377	37	4	18
2.14559	7.90435	-5.75876	37	4	18
4.19287	6.37607	-2.1832	37	4	18
-0.603211	15.6723	-15.6723	37	4	18
9.29501	2.84179	6.45322	37	4	19
0.839178	9.28757	-8.4484	37	4	19
6.85924	7.86566	-1.00642	37	4	19
0.812407	12.59	-11.7776	37	4	19
3.11465	11.8803	-8.76563	37	4	19
-0.177673	15.2889	-15.2889	37	4	19
6.24392	4.9892	1.25471	37	4	19
1.22142	7.56945	-6.34803	37	4	19
5.21117	5.32336	-0.112187	37	4	19
4.16025	6.93304	-2.7728	37	4	19
1.96554	7.9988	-6.03326	37	4	19
2.73923	12.0511	-9.3119	37	4	19
3.44732	7.88291	-4.43559	38	5	20
1.42672	8.46729	-7.04057	38	5	20
2.73798	8.41596	-5.67799	38	5	20
8.96343	2.9199	6.04353	38	5	20
1.4165	4.61127	-3.19477	38	5	20
4.93571	8.96203	-4.02632	38	5	20
6.07893	5.84309	0.235841	38	5	20
2.30404	8.29633	-5.99229	40	6	21
4.06742	7.87201	-3.80459	40	6	21
1.11809	11.3716	-10.2535	40	6	21
2.54682	7.02608	-4.47926	40	6	21
0.834148	10.1099	-9.27575	40	6	21
5.24287	8.50516	-3.26229	40	6	21
-0.862241	14.0383	-14.0383	40	6	21
0.798213	14.7824	-13.9842	40	6	21
4.54915	9.3297	-4.78054	40	6	21
1.87702	13.0366	-11.1595	40	6	21
