# Supplementary material for: Development of visual motion integration involves coordination of multiple cortical stages
Source: eLife. 2021 Mar 22;10:e59798. doi: 10.7554/eLife.59798 (PMC7984838; doi:10.7554/eLife.59798)
Supplement: Figure 4—source data 1. [file elife-59798-fig4-data1.xlsx]

## Sheet: Figure 4B and 4S1 A-B
P37-40	Data is not transformed								P41-47	Data is not transformed								Adult	Data is not transformed
dOri	22.5	45	67.5	90	112.5	135	157.5		dOri	22.5	45	67.5	90	112.5	135	157.5		dOri	22.5	45	67.5	90	112.5	135	157.5
	1.28723	1.28646	0.942166	1.06517	0.638258	0.761245	0.705431			0.690087	1.09546	1.25182	0.874294	0.633942	0.225043	0.0274127			0.86066	1.03043	0.81641	0.718758	0.758724	0.450985	0.481655
	0.788649	0.666384	0.736021	0.735624	0.642222	0.703154	0.478743			1.42699	1.78955	1.67248	1.63652	1.47101	1.0178	0.35232			0.591989	0.385526	0.353677	0.291023	0.209971	0.261254	0.456518
	0.667396	0.667621	0.652187	0.585127	0.607636	0.605683	0.307031			0.46189	0.584016	0.323639	0.388	0.240348	0.206144	0.228923			1.74627	1.45079	1.88555	1.0835	1.31445	0.786264	0.314292
	0.584501	0.499028	0.791277	0.728693	0.737024	0.688909	0.756167			1.10354	0.973639	0.605603	0.411275	0.281184	0.260839	0.193179			0.776683	1.44599	1.81744	1.62012	1.1777	0.57062	0.109845
	0.74321	0.765278	0.570332	0.372932	0.310976	0.29072	0.357171			1.34159	0.549685	0.0858503	-0.0516843	-0.0833572	-0.0716778	0.246745			0.703002	0.936184	0.992691	0.695703	0.468706	0.188354	0.132932
	0.528821	0.546845	0.282393	0.27581	0.13192	0.0691772	0.0478775			0.8516	0.906529	0.791392	0.642171	0.508651	0.543211	0.25284			1.68686	2.4119	1.91604	1.33502	1.16576	0.459026	0.27662
	0.500227	0.509417	0.398643	0.320187	0.285642	0.105041	0.141616			0.232458	0.278504	0.244981	0.247199	0.129906	0.13375	0.101878			0.886114	1.95894	2.52322	1.62401	0.61989	0.171515	0.0254453
	0.505134	0.412718	0.467251	0.343349	0.318032	0.276467	0.219922			0.791809	1.39214	1.165	1.08963	1.06472	0.729376	0.908835			0.348521	1.10539	1.1649	0.996338	1.13628	0.668726	0.191181
	0.604385	0.471705	0.458848	0.658523	0.647373	0.418257	0.357601			0.865101	0.852132	0.81794	0.697171	0.683062	0.879624	0.774418			0.379836	2.10396	3.16379	2.14094	0.523292	0.0502463	-0.153417
	0.991247	0.672831	0.398165	0.261601	0.318224	0.583694	0.992349			0.975888	0.897286	0.977748	1.11664	1.24913	0.973314	0.570629			1.64258	3.73487	3.61396	2.26824	1.24623	0.504343	0.0667826
	0.70937	0.573768	0.557549	0.438421	0.270462	0.212269	0.20303			0.722407	0.881634	1.03597	1.04546	0.875881	0.80498	0.355135			1.21272	2.29268	2.33146	1.53968	0.750749	0.434648	0.033
	0.988252	1.19592	1.59089	1.28902	1.61453	1.68116	1.14549			1.57692	2.05733	2.20326	2.10147	1.13673	0.557113	0.210767			0.677966	0.913433	0.893443	0.709805	0.351253	0.301439	0.240013
	0.535681	0.630102	0.519371	0.46493	0.467931	0.455702	0.433131			0.895084	1.17503	1.9026	2.77433	1.12392	0.0159286	-0.139346			0.883988	1.52206	1.29905	1.47018	0.861475	0.440682	0.601765
	0.676118	0.673245	0.385607	0.422002	0.183411	0.194507	0.241847			-0.483701	-0.110242	0.633515	0.992267	-0.392961	-0.46593	-0.357214			0.493977	0.348796	0.450277	0.474417	0.643939	0.165268	0.319942
	0.579116	0.465542	0.499136	0.448974	0.397496	0.422174	0.428243			0.552641	1.26706	1.60435	0.967765	0.476449	-0.000452026	-0.170537			0.792072	0.630394	0.388439	0.498746	0.385192	0.309149	0.226262
	0.690883	0.634718	0.539031	0.458299	0.475687	0.329847	0.3056			0.87195	0.942866	1.11649	0.657722	0.236959	0.0871991	-0.00223202			1.02573	4.95293	6.79468	6.46966	4.85129	3.35072	0.273193
	0.838406	0.941285	0.791134	0.627668	1.01386	0.697708	0.612647			1.07075	1.7307	2.11585	1.8145	0.649567	-0.00484666	-0.0535247			1.74941	3.32223	3.75447	3.72252	3.3655	3.22199	2.18659
	0.527877	0.607218	0.83095	0.681158	0.510066	0.366049	0.112396			0.448162	0.440604	0.762215	0.505038	0.318201	0.0302473	0.0488071			1.65792	2.01901	1.42045	1.04397	1.33387	1.60104	1.29243
	0.389197	0.727977	0.616908	0.562601	0.47027	0.38586	0.247442			0.808082	0.960047	0.666958	0.368202	0.194268	0.0628778	0.00339725			0.752265	0.678338	0.599644	0.389789	0.578661	0.670344	0.720722
	0.825695	0.841818	0.992449	1.01944	0.760889	0.560196	0.267838			0.910471	1.26766	1.25075	1.30097	1.03255	0.99579	0.648547			1.09881	1.92255	2.2106	2.04309	2.16678	1.50008	0.326926
	0.262313	0.205808	0.354475	0.495428	0.340593	0.175039	0.132477			0.83515	1.17971	1.18897	1.15658	1.0239	0.986493	0.794113			1.32913	1.13652	1.04247	0.895425	0.861031	0.629552	0.741271
	0.565041	0.653486	0.764426	0.75073	0.692043	0.811134	0.709026			0.676543	0.676366	0.655765	0.52984	0.441539	0.296917	0.238213			0.302454	0.415753	0.433706	0.348621	0.0875027	0.240167	0.0424423
	2.31845	2.7701	2.64122	2.41843	1.27435	1.44544	1.45717			1.14383	1.92889	2.11314	1.88719	1.28755	0.734447	0.283651			0.769971	0.565308	0.596322	0.473157	0.461115	0.236683	0.139386
	0.63231	0.893002	0.810303	0.78584	0.531923	0.561974	0.115609			0.776057	0.865208	0.843	0.863538	0.334201	0.45986	0.211041			0.567357	0.701694	0.302913	0.533567	0.12408	0.105722	0.160507
	0.437084	0.444513	0.352258	0.295421	0.180675	0.205812	0.21852			0.625732	0.586819	0.738799	0.536176	0.333286	0.190964	0.258179			0.613946	0.474801	0.267563	0.238013	0.0934898	0.0721057	0.0854899
	0.491761	0.332439	0.26277	0.215096	0.262323	0.263532	0.342725			1.23161	1.70514	2.03518	1.86441	1.22777	0.405031	0.0963445			0.628481	0.33863	0.212657	0.289988	0.308833	0.166643	0.179105
	0.321827	0.342179	0.261298	0.166992	0.143422	0.126879	0.0874586			0.689905	0.510032	0.459421	0.469431	0.425689	0.283867	0.273478			0.446636	0.550788	0.483026	0.375888	0.212084	0.153977	0.121223
	0.450914	0.100676	0.324663	0.241432	0.310627	0.206168	0.293873			1.17334	1.71667	2.23802	2.02281	1.97948	0.601739	0.110544			0.691503	0.736404	0.64818	0.628396	0.468392	0.638699	0.495174
	0.246826	2.94579	4.25408	4.50137	2.68634	0.700503	0.648902			1.30527	2.2449	2.67111	1.99709	0.775806	0.0783453	0.0522806			0.518275	0.815126	0.547724	0.718044	0.332264	0.214742	0.1926
	0.212826	0.208425	0.291936	0.331991	0.289787	0.237904	0.108388			0.721001	0.890995	1.22004	2.24482	1.04702	0.486905	0.104528			0.82967	1.2689	1.11761	0.872608	0.643597	0.515976	0.381893
	0.748268	0.773582	0.622156	0.510661	0.576861	0.810566	0.558018			0.796613	0.472717	0.789232	1.08267	0.603064	0.326722	0.0872409			1.48994	1.97916	2.79816	2.80779	1.40602	0.296891	0.0099456
	0.766465	0.825999	1.27867	0.912534	0.452686	0.20766	0.00416856			0.523039	0.368826	0.337915	0.411408	0.54583	0.50475	0.476918			0.518196	0.561913	0.417702	0.269974	0.231619	0.137641	0.112153
	0.512639	0.695054	0.732849	0.350818	0.229253	0.025944	0.10977			1.11273	1.22005	1.40238	1.27395	0.496812	0.153964	0.075526			1.05247	1.57283	1.83211	1.30915	0.968341	0.30327	0.0715802
	0.669296	0.841369	1.03968	2.00708	1.69546	0.64978	0.603881			1.30437	1.00693	1.88192	1.44575	0.949568	0.571284	0.759413			0.522933	0.714022	0.651525	0.757111	0.715288	0.340036	0.177949
	0.84064	0.742112	0.892343	0.580852	1.06724	0.788729	0.596651			0.778418	0.658328	0.63854	0.469594	0.385898	0.211179	0.109976			0.657962	0.8802	0.770554	0.438216	0.254747	0.11866	0.0468609
	0.73911	1.18228	1.31014	1.22913	0.739381	0.32129	0.00246604			1.34032	1.22637	1.00751	0.933057	0.998825	0.584467	0.0894001			0.885052	1.31315	1.34884	0.755186	0.391308	0.0240286	-0.00471178
	0.552332	0.673671	0.640085	0.415013	0.377202	0.347041	0.345489			0.466394	0.361916	0.380952	0.498264	0.2074	0.488433	0.0909634			1.02822	0.842192	0.648367	0.582976	0.563879	0.603178	0.486855
	0.665026	0.764775	1.42366	1.3645	0.805109	0.340397	0.273224			0.972901	1.31526	1.13176	0.948695	0.529095	0.651746	0.597248			0.996117	1.80143	1.80472	0.935321	0.759123	0.55662	0.236228
	4.28694	4.02438	3.93003	3.70967	4.82857	2.66228	1.85483			0.643677	0.774267	0.69084	0.252176	0.178754	0.171855	0.192868			0.690634	0.960601	0.726407	0.557266	0.483128	0.267389	0.12148
	1.23705	0.552467	0.216626	0.337461	0.570485	1.32942	1.63935			0.605888	0.270005	0.808755	0.730104	0.258216	-0.0167185	-0.596179			0.889919	0.727484	1.56399	2.06529	1.57079	0.853128	0.373643
	0.442958	0.517636	0.518353	0.392257	0.238629	0.173946	0.106337			0.126006	0.201292	-0.0363663	0.0261887	-0.0641616	-0.334937	-0.289038			0.602147	0.632554	0.672553	0.617087	0.435233	0.144141	0.0620197
	0.639017	1.10104	1.21931	1.15275	0.633867	0.459459	0.606346			0.877352	1.00856	0.85499	0.919002	0.326281	0.128988	0.0276992			0.628651	1.05419	0.937281	0.38983	0.584948	0.280328	0.312133
	1.0544	0.913423	1.03894	0.721566	0.356919	-0.0801314	-0.110989			0.826559	0.724342	0.800211	0.568392	0.417027	0.207823	0.208493			0.586465	0.577754	0.310191	0.128976	0.0417096	0.079018	0.0372358
	0.994075	1.19262	1.34191	0.962559	0.616102	0.331608	0.0270221			0.6738	0.579812	0.511062	0.293693	0.28644	0.396233	0.582431			0.329218	0.25422	0.135997	0.0814408	0.0835938	0.0703024	0.0921169
	0.438656	0.26478	0.279264	0.230054	0.23051	0.195195	0.168999			0.640441	0.557374	0.495447	0.286292	0.277249	0.213596	0.202055			0.374977	0.242317	0.19785	0.0863147	0.0655449	0.0624989	0.113033
	0.496545	0.367431	0.335495	0.345928	0.262194	0.141905	0.279516			0.78555	0.707235	0.904145	0.738501	0.509253	0.314106	0.195355			0.278985	0.317735	0.21421	0.244841	0.185954	0.21096	0.187575
	0.676318	0.530388	0.39724	0.202558	0.19931	0.222939	0.180204			0.551907	0.261283	0.253632	0.165754	0.211694	0.121994	0.327993
	0.595664	0.879201	0.834555	0.947835	0.576803	-0.0513086	-0.132493			0.552359	0.474962	0.492403	0.447403	0.426624	0.430661	0.416863
	0.821995	1.06551	0.884982	0.899709	1.08643	0.963012	0.507533			0.4888	0.61603	0.90427	0.907806	0.671602	0.530814	0.376378
	1.86678	2.82331	4.01044	3.70777	1.8848	1.05358	0.221247			0.644189	1.17247	1.10656	1.09535	0.490768	0.339249	0.0983783
	0.525782	0.523025	0.556545	0.441515	0.394231	0.429202	0.313979			1.15092	0.790798	0.851748	0.35919	0.265441	0.0810823	0.0396328
	1.53075	1.88367	3.08904	4.54601	4.72831	1.00152	-0.0453117			0.510381	0.546841	0.448827	0.532521	0.448835	0.525753	0.566578
	2.7159	2.91248	2.53034	2.90157	3.21743	2.30313	2.32158			0.610241	0.909105	0.577074	0.715798	0.759008	0.851467	0.836425
	0.812677	0.613866	0.882648	1.13895	0.904417	0.614147	0.251668			0.441801	0.488348	0.596777	0.507496	0.292432	0.142268	0.00867297
	0.641119	0.865649	1.11317	1.33652	1.24829	0.79459	0.564687			0.713021	0.781131	0.898209	0.867948	0.872437	1.02211	0.836616
	1.05276	2.3202	2.41946	2.41464	2.39401	1.87114	1.6438			1.65682	1.50213	1.19728	0.897417	1.05593	0.445452	0.0365252
	0.976486	1.41049	2.13329	2.0684	1.76948	0.932357	0.444239			0.627078	0.602918	0.515125	0.51829	0.414217	0.326264	0.271005
	0.447424	0.391586	0.548252	0.551836	0.880494	0.611525	0.398658			1.26313	0.781278	0.706661	0.683483	0.222945	0.291342	0.191284
	0.988433	1.10363	2.3129	2.92001	2.15856	0.835513	0.443075			0.391521	0.459083	0.499324	0.573868	0.33795	0.366931	0.295655
	0.367963	0.895556	1.08862	1.04673	1.18674	0.591171	0.387755			0.431522	0.43208	0.478421	0.597469	0.172989	0.102529	0.099166
	0.678766	0.552229	0.560423	0.498002	0.278063	0.230628	0.11053			0.76167	1.18969	1.35647	0.586666	0.38318	0.193303	0.0529603
	0.406251	0.366335	0.316375	0.323468	0.293857	0.264915	0.345325			1.13051	1.30899	1.23157	1.10148	0.961253	0.881295	0.550608
	0.921499	0.974174	1.0309	0.675905	0.510583	0.408691	0.172667			0.886507	1.04516	1.50556	1.20389	0.93228	0.26794	0.154035
	1.69186	1.5232	1.86704	1.40223	1.18228	1.05095	0.518897			0.732789	1.43374	2.20228	1.7445	2.698	1.98653	1.26817
	0.511407	0.394019	0.373107	0.352589	0.266923	0.456571	0.555022			0.706237	0.639071	0.608179	0.62251	0.438092	0.260556	0.142998
	0.687479	0.534564	0.504364	0.284777	0.364911	0.326044	0.258545			0.765223	0.603677	0.558035	0.614459	0.362933	0.176418	0.156483
	0.259091	0.270167	0.253734	0.180611	0.190678	0.243911	0.286741			1.42639	1.30605	1.73729	1.32546	1.02848	0.745092	0.560274
	0.709703	0.781568	0.548983	0.667172	0.636885	0.67352	0.613566			0.540852	0.486894	0.568352	0.477405	0.317625	0.308589	0.075664
	0.674117	0.549027	0.47866	0.178767	0.249677	0.366057	0.654777			0.683132	1.26598	1.05119	1.05486	0.754321	0.431876	0.400754
	0.572606	0.323423	0.265686	0.286626	0.415974	0.390901	0.625198			0.613176	0.582521	0.429515	0.884536	0.834518	1.04701	0.531672
	0.618992	2.16778	1.04069	1.58902	0.260077	0.0147354	-0.0757296			0.505412	0.711874	0.706084	0.877862	0.758884	0.545184	0.228185
	0.473292	0.521877	0.274069	0.154716	0.155832	0.101008	0.0791034			0.473752	0.527077	0.910223	0.927795	0.744568	0.683113	0.349397
	0.607477	0.685281	0.635221	0.453581	0.466594	0.394123	0.345326			1.02583	1.09397	1.75925	2.04488	1.41762	0.965964	0.400627
	0.712171	0.906868	0.912613	0.569654	0.365758	0.235394	0.0315838			0.392214	0.415814	0.0314662	0.157365	0.242647	0.173093	0.207265
	0.552583	1.12871	1.01787	0.808759	0.509775	0.501366	0.543807			0.43154	0.451351	0.393856	0.390176	0.360887	0.300235	0.247326
	0.228313	0.228814	0.352347	0.455119	0.41334	0.307421	0.27878			2.51503	1.61013	1.25566	1.25879	1.18036	0.722079	0.761279
	0.5445	0.526873	0.423387	0.403777	0.399267	0.402382	0.296119			1.75937	1.61755	2.45138	2.0969	2.3857	2.20679	1.48667
	0.630995	0.531341	0.643058	0.639766	0.608464	0.587671	0.486679			0.404426	0.478308	0.488221	0.670634	0.519255	0.406233	0.297488
	0.750401	0.84909	1.1174	1.45108	1.73001	0.949303	0.771289			0.785806	0.653857	0.57655	0.35636	0.371783	0.618198	0.796884
	0.622773	0.683795	0.838822	0.754572	0.75168	0.506875	0.429606			1.36606	1.59223	1.41802	1.58973	1.29131	0.829269	0.383587
	0.795324	1.09976	0.83904	0.510926	0.222483	0.078279	0.159765			0.650298	0.753101	0.700101	0.708287	0.682422	0.679569	0.461276
	1.00978	0.898511	0.709058	0.655029	0.489467	0.124839	0.0859715			1.07675	1.11512	0.90167	0.911813	0.747165	0.354785	0.298401
	0.844137	1.09535	2.2854	1.65266	0.924796	0.318301	0.114502			0.676733	0.944834	0.968493	0.709708	0.584597	0.499717	0.286349
	0.794102	0.662508	1.1299	1.20735	0.656848	0.339964	0.32827			0.504052	0.30574	0.380666	0.411402	0.278336	0.261646	0.173385
	0.612222	0.582751	0.572613	0.783494	0.566824	0.411068	0.182107
	0.525874	0.530592	0.589474	0.56	0.529767	0.474281	0.291536
	0.453509	0.332719	0.377882	0.413979	0.37319	0.177503	0.376807
	0.588542	0.520167	0.412799	0.430905	0.344937	0.298324	0.221782
	0.643867	0.591755	0.780856	1.02618	0.696776	0.428297	0.439976
	0.545919	0.608614	0.49687	0.313374	0.147907	0.173363	0.0360818
	0.608191	1.24863	1.02839	1.29045	0.728785	0.480378	-0.00457924
	0.438647	0.293585	0.251218	0.234139	0.180291	0.175311	0.132746
	0.327314	0.176405	0.118389	0.143149	0.151566	0.176253	0.229509
	0.782174	0.298708	0.31733	0.20168	0.299957	0.356309	0.233061
	0.58929	0.738672	0.972823	1.07663	0.927477	0.493684	0.251783
	0.245537	0.481899	0.55839	0.790932	0.757674	0.396364	0.218157
	0.936652	1.19431	0.974083	0.845086	0.815812	1.06398	0.778274
	0.678309	0.918363	1.20454	1.38899	1.36517	0.939305	0.724396
	1.60263	1.47533	1.45035	1.0567	1.3821	1.37967	1.42208
	1.08677	0.770135	0.9154	0.8603	0.600049	0.364764	0.376595
	0.756737	0.685579	0.627064	0.436321	0.143057	0.114675	0.063542
	0.837973	1.07637	0.691448	1.80312	2.70818	2.09891	2.82527
	0.752343	0.618485	0.671398	0.733065	0.423731	0.385047	0.356027
	1.01768	1.29582	1.07757	1.06838	0.593603	0.250137	0.431962
	1.36787	1.43968	1.41314	1.27044	1.08178	0.911616	0.505245
	0.380982	0.4433	0.32086	0.333748	0.272803	0.323963	0.380819
	0.588601	0.562368	0.466558	0.327206	0.310105	0.317744	0.127952
	0.353134	0.579461	0.483337	0.530783	0.498136	0.516788	0.313849
	0.918837	0.91543	0.70517	0.546171	0.487603	0.641218	0.565317
	0.727119	1.06834	1.20763	1.23304	1.04346	1.01184	0.833475
	0.530375	0.53789	0.405699	0.354234	0.397787	0.42583	0.499455
	0.436601	0.426971	0.333106	0.319991	0.32765	0.285173	0.238802
	0.946814	1.03531	1.04355	0.740652	0.881111	0.807811	0.631436
	1.02352	1.20363	1.0047	1.09001	1.12061	1.13256	0.750491
	0.557766	0.711197	0.545485	0.564408	0.535993	0.635365	0.608084
	0.968323	1.19883	1.39764	0.959872	0.864708	0.621776	0.384426
	0.631156	0.550375	0.556693	0.357353	0.354617	0.225039	0.274962
	0.733111	0.66258	0.650811	0.360403	0.30181	0.228414	0.0986601
	0.980166	0.95993	1.59653	1.64167	1.74941	1.51564	1.54005
	0.725944	1.27546	1.20684	1.06501	0.861827	1.32775	0.906805
	0.603055	0.54825	0.338931	0.268739	0.0831042	0.157151	0.0876059
	0.712145	0.539665	0.354512	0.392067	0.336548	0.324324	0.231551
	0.611064	0.540212	0.459329	0.501074	0.45455	0.522743	0.345368
	0.908729	0.793883	0.751257	0.437336	0.321505	0.318567	0.2285
	0.547664	0.536568	0.545435	0.368333	0.45034	0.306204	0.269204
	0.813839	0.558092	1.01432	0.863776	0.26735	0.00409845	-0.0510056
	0.611787	0.819817	0.890106	0.705256	0.732265	0.394684	0.1891
	0.693032	0.75573	0.475334	0.171151	0.080477	0.213868	0.27621
	0.540985	0.657369	0.919797	0.946921	0.831988	0.604167	0.470714
	0.617144	0.545145	0.65237	0.674712	0.527718	0.966581	0.718628
	0.62093	0.641297	0.642138	0.680457	0.841222	0.963722	0.867976
	0.581663	0.836544	0.891277	0.545386	0.40327	0.297424	0.170363
	0.564258	1.07548	1.09071	1.02982	0.946672	0.432852	0.315803
	1.41155	1.57034	2.67489	3.25355	3.00975	2.49787	0.614299
	0.465364	0.503938	0.489528	0.294582	0.164284	0.131932	0.148298
	0.544635	0.794363	0.893461	0.781105	0.875647	0.617795	0.345626
	0.549904	0.609665	0.625034	0.420696	0.295444	0.300688	0.321008
	0.276716	0.202356	0.120032	0.207558	0.138966	0.214233	0.313383
	0.202406	0.211908	0.192716	0.106346	0.0114684	0.00391909	-0.00594734
	0.612373	0.611552	0.711554	0.630252	0.491328	0.275886	0.0751732
	0.533882	0.687403	0.985192	0.794959	0.85492	0.347693	-0.107019
	0.168563	0.598901	0.450429	0.697635	1.03561	1.47822	1.19221
	0.787533	0.802339	0.99679	0.843845	1.02874	1.09058	0.705185
	0.718521	1.15467	0.7141	0.726219	0.454144	0.0949849	0.220626
	0.388697	0.894966	1.01912	1.12134	0.715695	0.510697	0.159143
	0.909637	1.08675	1.40579	1.21189	0.757742	0.343787	0.282143
	0.681601	0.898392	0.439793	0.311184	0.205165	0.40514	0.0615699
	0.452049	0.426678	0.445958	0.311017	0.196743	0.0464625	0.0811832
	0.521486	0.596841	0.509362	0.411889	0.716701	0.690232	0.864081
	0.447779	0.345757	0.309921	0.29722	0.286725	0.27691	0.28317
	0.678717	0.707102	0.640372	0.556468	0.460956	0.501768	0.564142
	0.391911	0.368898	0.438259	0.40722	0.380816	0.34294	0.332413
	0.517504	0.641964	0.343974	0.279039	0.273899	0.244678	0.336667

## Sheet: Figure 4C and 4S1 C-D
P37-40			P41-47			Adult
Max plaid / max grating (not transformed)	Pattern index		Max plaid / max grating (not transformed)	Pattern index		Max plaid / max grating (not transformed)	Pattern index
0.490644	-4.11909		1.5512	15.9573		0.463943	-0.994326
0.592447	-14.7106		1.2315	2.9329		0.068479	-5.50975
0.381137	-5.75017		0.322018	-0.99064		0.42	-8.03713
0.407755	-19.1075		0.242928	-1.7019		1.41439	16.8635
0.260227	-1.03551		0.147015	1.42709		0.492701	7.0168
0.267	7.70683		0.739775	-1.63119		0.446429	-1.59618
0.269953	-3.90687		0.261983	-0.00564623		0.586382	2.3847
0.328358	-14.6255		0.871531	-5.4973		0.691176	-5.70789
0.618072	-16.8213		0.393054	-6.65092		0.474732	-4.0705
0.168768	-9.62438		0.566879	-11.8332		1.92841	7.09615
0.323577	-3.59217		0.735793	-2.58417		0.78082	2.67214
0.515837	-7.91106		1.73616	7.07506		0.382344	0.309177
0.410985	-11.6137		1.64378	-8.80663		0.71621	1.26699
0.317492	-0.280918		1.60125	3.27006		0.72632	2.66629
0.283794	-9.12695		0.821772	11.3848		0.334717	0.836252
0.346639	-5.53372		0.446825	9.20544		3.54098	16.4798
0.444682	-5.61863		1.46936	9.58215		2.06954	-3.17126
0.463914	0.572676		0.585906	13.9298		0.462319	-7.58842
0.236289	-3.38072		0.527937	1.49429		0.278075	-5.2141
0.4375	-5.87094		0.686319	-2.88568		0.997744	2.02358
0.439157	-13.4126		0.705633	-4.1732		0.766919	3.76153
0.443959	-10.5054		0.324153	-1.80612		0.260684	-3.9988
0.431192	-7.60573		0.939904	-0.0629161		0.324554	-12.4165
0.384306	-7.70565		0.535222	-0.906021		0.58692	3.22637
0.277088	-8.63406		0.536662	1.02401		0.155252	-2.62874
0.272572	-8.38809		1.60694	9.40835		0.250224	-9.67286
0.181366	-1.0044		0.262957	-4.71605		0.28695	2.19031
0.347925	-10.2236		2.90299	9.09003		0.31848	-2.27692
1.4085	7.81077		0.964636	1.06443		0.596721	3.45552
0.301848	-11.6211		0.964339	5.54819		0.653421	0.137211
0.317201	-11.3805		0.450189	-5.1312		1.332	9.19133
0.427026	-2.75745		0.204809	-11.1881		0.275422	-0.642379
0.466771	2.15641		1.3356	19.9848		0.717241	-1.3448
1.20718	-1.71681		0.912903	1.57997		0.704403	5.38464
0.390704	-8.40112		0.625253	2.43507		0.54347	10.8783
1.52919	0.0431602		0.954024	4.84333		0.40339	6.91701
0.225694	-7.24219		0.335464	-4.49697		0.317634	-6.14614
1.17845	0.0310319		0.840869	1.56611		0.470616	-1.31018
0.643059	-8.5887		0.369122	-1.05317		0.412903	1.21498
0.297032	-3.47782		0.350988	1.91379		1.23525	8.93863
0.391945	7.00161		0.385423	-1.08185		0.398982	3.06615
0.718854	-1.70711		0.701281	5.13106		0.293034	-1.47351
0.47176	3.68977		0.578476	-4.70379		0.247008	6.22988
0.58817	2.91161		0.168755	-12.6172		0.111283	-5.97207
0.222955	-6.21704		0.27809	0.694244		0.123726	-0.663798
0.342415	-2.15699		0.595777	7.04642		0.25652	-1.58905
0.305026	-6.36455		0.0630325	-7.9593
0.606974	1.6499		0.310107	-10.8665
0.286553	-11.6782		0.475817	-2.54093
0.662309	1.14164		0.722916	-0.0150692
0.291778	-6.58738		0.178965	5.36832
1.73946	6.39254		0.338528	-6.97823
1.17352	-5.95785		0.51044	-0.982296
0.554358	-2.91669		0.544302	3.39365
0.613155	-6.02629		0.387546	0.110108
0.680556	-6.54882		0.327099	4.85378
0.807692	-0.497146		0.469807	-3.39756
0.483871	-3.56051		0.523891	0.533272
1.01901	-2.33374		0.338564	-5.10615
0.950983	-0.724489		0.371622	1.76574
0.312635	-5.99229		0.768694	3.0741
0.140078	-3.80459		0.608817	-1.38011
0.431374	-10.2535		1.41087	8.37126
1.14576	-4.47926		1.15504	-6.79417
0.242586	-9.27575		0.317249	0.174173
0.2904	-3.26229		0.754066	3.42898
0.123612	-14.0383		0.520181	-1.3541
0.357468	-13.9842		0.317668	-7.56879
0.28434	-4.78054		0.775837	-1.70443
0.236121	-11.1595		0.52907	-11.9801
0.829226	-1.45058		1.25568	-3.02371
0.136442	-2.67326		0.403036	-6.17185
0.456232	-10.6229		0.947411	-5.67972
0.575202	-1.30371		0.31458	-1.38281
0.430524	-2.45005		0.32133	-6.992
0.360404	-3.86541		0.503744	-6.58863
0.491746	-6.00937		0.449428	-5.24267
0.745192	-4.5102		0.338137	1.52156
0.625989	0.0772679		0.262644	-7.99091
0.346051	-9.02783		0.872753	-7.59643
0.330782	10.2506		0.497076	-13.2607
0.329392	1.15721		0.69817	2.15181
1.26937	-0.953165		0.792924	3.28242
0.648271	5.97882		0.199513	-0.887225
0.852941	1.35265
0.245646	-6.64333
0.316707	-5.56303
0.494306	-0.552359
1.03934	-8.5381
0.346154	5.11953
0.705218	-3.53949
0.194536	-11.3851
0.143889	-4.49175
0.209042	-5.00208
0.593116	-8.03376
0.349701	-0.0459299
0.437451	-9.09096
0.77122	-4.43559
0.603679	-7.04057
0.436817	-5.67799
0.385999	6.04353
0.913387	-3.19477
0.444365	-4.02632
0.543041	0.235841
0.793651	-14.5326
0.190188	-11.1702
0.374729	-2.55003
0.293753	-8.89063
0.36822	-6.85994
0.611708	-2.89309
0.291028	-12.5588
0.316526	-8.39022
0.409816	-11.6689
0.379886	-15.7152
0.282421	-7.73188
0.911402	-15.0806
0.165293	-5.17044
0.467914	-6.20287
0.791804	-8.70118
0.685422	-10.7306
0.340105	1.409
0.313315	-8.4377
0.362094	-5.75876
0.349152	-2.1832
0.334339	-15.6723
0.418229	6.45322
0.590909	-8.4484
0.174389	-1.00642
0.354149	-11.7776
0.253756	-8.76563
0.412287	-15.2889
0.699322	1.25471
0.526554	-6.34803
1.1981	-0.112187
0.232664	-2.7728
0.89437	-6.03326
0.202975	-9.3119
0.127273	-8.42109
0.136914	7.5855
0.477862	-4.73659
0.634774	-6.94098
0.506731	-5.14303
0.396226	-13.4559
0.507988	1.97176
0.702604	3.7661
0.607423	-0.401496
0.314475	-6.44734
0.332771	10.7401
0.260376	-10.1939
0.346887	-8.91482
0.578252	-3.93816
0.264307	-6.39062
0.317397	2.25802
