# Supplementary material for: Development of visual motion integration involves coordination of multiple cortical stages
Source: eLife. 2021 Mar 22;10:e59798. doi: 10.7554/eLife.59798 (PMC7984838; doi:10.7554/eLife.59798)
Supplement: Figure 5—source data 1. [file elife-59798-fig5-data1.xlsx]

## Sheet: Figure 5B
P37-40	Data is not transformed								P44-47	Data is not transformed								Adult	Data is not transformed
dOri	22.5	45	67.5	90	112.5	135	157.5		dOri	22.5	45	67.5	90	112.5	135	157.5		dOri	22.5	45	67.5	90	112.5	135	157.5
	0.561527	0.695731	0.602788	0.806094	0.753451	0.85107	0.584272			0.59688	0.59422	0.632509	0.721921	0.793157	1.07135	0.420203			0.815464	1.00237	1.26869	1.05324	1.04294	0.534819	0.343919
	0.605211	0.585497	0.583251	0.639891	0.694318	0.676419	0.64723			1.2765	1.51988	1.71647	1.60557	1.01614	0.634668	0.351772			0.495031	0.404308	0.390274	0.370109	0.338456	0.331245	0.357951
	0.466877	0.310538	0.185819	0.111052	0.161191	0.365525	0.533731			1.27056	0.309788	0.4951	0.642946	0.148822	0.050009	1.13464			0.850456	0.645646	0.463887	0.521257	0.409118	0.42823	0.472777
	0.453703	0.541095	0.608489	0.475738	0.515767	0.679753	0.644334			1.18073	1.02275	0.933887	0.741785	0.707873	0.753154	0.756918			0.39483	0.308827	0.299028	0.323266	0.323108	0.291181	0.441478
	0.466781	0.313487	0.291644	0.324872	0.674106	0.950283	0.990102			1.55459	1.79032	0.893613	0.725779	0.211619	0.712237	0.314171			0.532966	0.463439	0.392191	0.388485	0.497328	0.506819	0.569813
	0.639626	0.858394	0.727247	0.708669	0.546493	0.45568	0.328002			0.779978	0.712458	0.96168	0.720933	0.408024	0.217629	0.377954			0.414126	0.396936	0.301315	0.306452	0.27994	0.287218	0.374829
	0.48025	0.522207	0.78696	0.546132	0.578384	0.37997	0.258536			0.591455	0.685633	0.689877	0.652189	0.527559	0.614687	0.338546			0.462906	0.397439	0.285523	0.302945	0.208298	0.148862	0.23447
	0.643153	0.463439	0.350911	0.481106	0.59159	0.652032	0.789794			0.33054	0.595209	0.641534	0.892026	0.82595	0.772559	0.882738			0.891476	1.28331	0.967608	1.26991	1.26296	1.19448	0.762973
	0.577147	0.579079	0.40611	0.399486	0.387335	0.525403	0.374623			0.780393	0.651635	0.488553	0.498603	0.587652	0.579769	0.777183			0.388921	0.430276	0.354343	0.352803	0.415016	0.29882	0.551721
	0.39002	0.374607	0.316492	0.379538	0.416644	0.550474	0.54784			0.488212	0.519831	0.475877	0.462403	0.45316	0.366162	0.38531			0.440975	0.681168	0.430591	0.574809	0.324313	0.437365	0.432534
	0.596265	0.722188	0.646095	0.590732	0.52824	0.78209	0.618857			0.583457	0.651826	0.444043	0.519085	0.498252	0.591648	0.512125			0.421661	0.686332	0.780666	0.598731	0.1298	0.543057	0.295227
	0.682927	0.687398	0.74081	0.77078	0.776204	0.767738	0.699118			0.968276	0.834227	0.913613	1.11688	0.945524	0.598935	0.377507			0.470748	0.358251	0.227714	0.144019	0.181261	0.164588	0.23697
	0.473978	0.430872	0.478693	0.264656	0.238113	0.32192	0.327268			0.739072	1.23529	1.54843	1.18329	0.991487	0.944571	0.735103			0.442027	0.328565	0.257592	0.140792	0.216711	0.199221	0.309673
	0.607183	0.543631	0.734715	0.554235	0.519015	0.361279	0.212646			0.394297	0.429201	0.97505	1.90174	2.33028	1.38465	1.4451			0.500975	0.297512	0.300317	0.208909	0.195266	0.225593	0.320975
	0.390245	0.351159	0.39037	0.222592	0.182395	0.194029	0.272025			1.08189	0.631941	0.703075	1.21806	1.53551	0.92693	0.97128			0.431961	0.315532	0.220225	0.128479	0.15496	0.19331	0.267158
	0.599106	0.642328	0.743152	0.618235	0.672152	0.666532	0.748024			2.27787	2.06527	3.62571	5.06761	4.5416	2.25363	3.39867			0.349648	0.392838	0.247424	0.235945	0.211065	0.268163	0.250683
	0.66632	0.458568	0.664476	0.572417	0.410864	0.366565	0.552781			0.594693	0.581461	0.536799	0.569058	0.846726	0.709105	0.581832			0.595797	0.671409	0.755271	0.769261	0.842645	0.846666	0.89795
	0.620089	0.656763	0.689822	0.568973	0.677046	0.684764	0.627012			0.499068	0.562977	0.252497	0.172023	0.171421	0.236105	0.516674			0.496953	0.431549	0.271422	0.223485	0.211508	0.244025	0.304651
	0.475393	0.3905	0.445676	0.361535	0.329428	0.19894	0.232567			0.867882	0.824509	0.883181	0.637062	0.81607	0.781355	0.711717			0.428028	0.370994	0.186164	0.137	0.150002	0.203379	0.269328
	0.485392	0.431058	0.396502	0.336451	0.39965	0.563864	0.737253			0.523956	0.525568	0.680527	0.684105	0.580177	0.63845	0.553605			0.468256	0.407041	0.383946	0.373538	0.362203	0.483972	0.380812
	0.349396	0.249324	0.21535	0.180953	0.102384	0.112552	0.137799			0.523727	0.502667	0.633539	0.696499	0.253447	0.34681	0.361447			0.37072	0.450624	0.452766	0.409	0.38782	0.35994	0.441707
	0.601255	0.717379	0.783083	0.788743	0.673692	0.696562	0.635912			0.853816	0.671641	0.892784	0.979008	0.826512	0.840842	0.612246			0.256388	0.223655	0.156633	0.174967	0.126601	0.161532	0.205227
	0.79512	0.968266	1.13476	0.979653	0.850222	0.800131	0.618973			1.10232	1.0851	0.774342	0.428238	0.647047	0.964639	1.33075			0.531668	0.3319	0.266144	0.400202	0.303297	0.162881	0.185706
	0.504234	0.5272	0.41489	0.275382	0.136642	0.0911869	0.0594266			0.702198	0.924613	1.27547	1.47377	1.21628	0.936112	1.35462			0.611474	0.402275	0.286538	0.245509	0.198037	0.118623	0.133223
	0.712509	0.976908	0.880191	1.44455	1.31692	0.882753	0.65686			1.15695	1.34685	0.774103	1.11782	0.696894	0.819108	1.31861			0.56282	0.539984	0.345512	0.312518	0.286797	0.290659	0.329194
	0.687859	0.850136	0.801155	1.00767	0.722601	0.569683	0.518292			0.55203	0.484356	0.459949	0.413583	0.255422	0.360986	0.300949			0.613273	0.599733	0.456596	0.458706	0.386613	0.357589	0.347068
	0.553347	0.64529	0.838482	1.12994	0.89209	0.800687	0.622964			0.837827	0.835615	0.928709	1.12785	0.829948	0.834701	0.713315			0.486001	0.518269	0.405903	0.291773	0.187893	0.242042	0.1023
	0.614219	0.645835	0.633114	0.810672	0.727325	0.635057	0.481973			0.773181	0.602331	0.631134	0.528664	0.565784	0.420039	0.337573			0.421382	0.34741	0.252992	0.188562	0.114835	0.139414	0.290481
	0.472244	0.441643	0.561685	0.737243	0.740889	0.710374	0.71993			0.697209	0.691733	0.867129	0.81925	0.816681	0.593966	0.545267			0.575678	0.581981	0.479658	0.392956	0.320424	0.562379	0.701047
	0.762121	1.05383	0.979392	0.898682	0.991394	0.997383	0.865385			0.54754	0.689159	0.987411	1.03705	0.876097	1.12002	1.52837			0.655969	0.738896	0.657522	0.639346	0.541184	0.573771	0.817992
	0.532543	0.670215	0.581309	0.65546	0.562341	0.476284	0.389077			0.489968	0.773661	0.641493	1.23885	1.65656	2.06341	3.21526			0.826782	0.679647	0.674784	0.601915	0.669734	0.616426	0.442317
	0.465996	0.457915	0.539072	0.35095	0.284689	0.24732	0.166578			0.559192	0.579436	0.563865	0.613146	0.541213	0.416856	0.53179			0.216962	0.168458	0.191058	0.222962	0.137252	0.157634	0.145284
	0.506557	0.429363	0.56209	0.538508	0.539413	0.603475	0.408361			0.603547	0.525545	0.300347	0.367187	0.172922	0.13475	0.1247			0.542944	0.388305	0.412101	0.366031	0.308716	0.281824	0.412862
	0.690604	0.869213	1.19267	1.10591	0.484841	0.393811	0.0426199			0.644297	0.575357	0.49652	0.454761	0.385349	0.449329	0.478935			0.448564	0.45678	0.431199	0.276403	0.333001	0.176786	0.205634
	1.08066	0.899258	1.04811	1.05915	0.987678	1.74357	1.28107			0.529587	0.780486	0.689317	0.672448	0.40791	0.35305	0.201942			0.531535	0.520462	0.362453	0.304206	0.360258	0.440721	0.702361
	0.692551	0.628596	0.565999	0.493697	0.474043	0.509415	0.660335			0.684087	1.19487	0.974588	1.18638	1.35993	0.713733	0.839133			0.539027	0.608721	0.747217	0.581918	0.693324	0.484866	0.3176
	2.00484	0.768974	0.56665	1.74663	2.00774	1.98577	1.96438			0.697076	0.682741	0.860323	0.69757	0.769986	0.760212	0.760312			1.38115	1.50666	1.28982	1.03728	1.17475	1.1483	1.00324
	0.574845	0.651569	0.444385	0.324145	0.324128	0.439798	0.437017			0.445967	0.42314	0.585434	0.409354	0.292204	0.417258	0.453014			0.378592	0.158555	0.0859116	0.0586973	0.0630829	0.0842718	0.178953
	0.579992	0.631277	0.553513	0.562193	0.657598	0.451811	0.3548			0.602522	0.644719	0.568121	0.529557	0.504951	0.418408	0.632685			0.729043	0.467047	0.444693	0.291737	0.18149	0.134279	0.346011
	0.896384	1.29239	1.4417	1.49802	1.41841	1.27822	0.789985			0.455183	0.708462	0.730966	0.785619	0.597422	0.69005	0.479213			1.0545	0.923335	0.780973	0.690827	0.611876	0.96387	0.823529
	0.822937	0.997863	0.546007	0.276486	0.456015	0.80359	0.849595			0.392826	0.504625	0.476038	0.678669	0.584175	0.573982	0.385104
	0.709207	0.502458	0.305421	0.140627	0.196393	0.298519	0.762718			0.375121	0.396036	0.426877	0.498127	0.390847	0.554082	0.538956
	0.798021	0.812452	0.584087	0.23723	0.274032	0.581626	0.527205			0.596472	0.586528	0.873467	0.800235	0.680233	0.760165	0.676543
	0.502195	0.506017	0.408577	0.157294	0.133157	0.169746	0.256506			0.69973	0.682357	0.538937	0.667309	0.881861	0.934025	1.31697
	0.554631	0.499589	0.404805	0.272853	0.288843	0.403511	0.474944			0.565454	0.606046	0.572687	0.673047	0.58766	0.385075	0.36994
	0.414199	0.523042	0.42803	0.569922	0.580864	0.49582	0.437459			0.498374	0.517348	0.502236	0.567272	0.529166	0.36375	0.320579
	0.435835	0.428504	0.316676	0.270444	0.339735	0.429946	0.569665			0.523628	0.474371	0.464806	0.452618	0.417485	0.332911	0.328095
	0.609778	0.545864	0.645537	0.518796	0.333103	0.289193	0.29525			0.692452	1.12601	1.20938	1.45557	1.48685	1.54167	0.89685
	0.659166	0.629658	0.540846	0.60954	0.48575	0.459493	0.499976			0.359198	0.431744	0.792027	0.84347	0.669684	0.258898	0.0805444
	0.843247	0.82334	0.962147	0.661179	0.527091	0.578486	0.577066			0.708234	0.793298	0.767866	0.681104	0.781199	0.493686	0.459758
	0.628869	0.585148	0.511851	0.469003	0.421354	0.398463	0.442977			0.622937	0.70174	0.678307	1.03934	1.13885	1.12652	0.884059
	0.653049	0.929534	0.975302	0.917421	0.834164	0.643043	0.439856			0.262361	0.359965	0.172617	0.33836	0.217152	0.0616674	0.0271892
	0.664822	0.912345	0.817855	0.689248	0.672124	0.596192	0.824405			0.946038	1.01935	1.29669	2.42774	1.66781	0.413391	0.310377
	1.0041	0.826089	0.60574	0.450696	0.377426	0.431962	0.442464			1.24349	1.26213	1.95542	3.13207	3.49616	2.79292	2.51629
	1.26617	1.26262	1.18203	0.958101	0.737093	0.632096	0.547019			0.556645	0.699642	0.613277	0.540572	0.597325	0.693328	0.759948
	0.405124	0.609288	0.622322	0.704984	0.486661	0.438642	0.31179			0.59806	0.731063	0.762861	0.828787	0.519053	0.511604	0.449135
	0.358656	0.335269	0.159282	0.223571	0.20645	0.182099	0.230167			0.717939	0.560615	0.323397	0.425094	0.278986	0.227171	0.212918
	1.3009	0.984018	1.39278	1.26777	1.37445	1.26311	0.679726			0.726937	0.837419	1.02541	1.28027	0.964325	0.831861	0.303982
	0.264825	0.549975	0.788073	0.9645	0.793406	0.491091	0.243184			0.538993	0.655562	0.723065	0.614621	0.278073	0.148257	0.179385
	0.605184	0.518567	0.594063	0.6019	0.530921	0.511794	0.464907			0.936683	0.89143	0.518705	0.343373	0.290361	0.104477	0.0729671
	0.349983	0.387445	0.465454	0.603588	0.448813	0.48552	0.378711			0.680142	0.577808	0.560274	0.537603	0.446958	0.361938	0.456869
	0.343934	0.511229	0.574855	0.594694	0.50497	0.36601	0.18485			0.865204	0.778822	0.661655	0.57441	0.48664	0.354121	0.298242
	0.480108	0.377522	0.332521	0.443621	0.391576	0.511964	0.524343			0.474684	0.596939	0.528565	0.493399	0.494925	0.523716	0.640931
	0.413606	0.32342	0.3324	0.361852	0.329691	0.345569	0.333333			0.648613	0.748426	0.65565	0.598168	0.547789	0.405319	0.477604
	0.453862	0.264965	0.368526	0.454855	0.274564	0.243651	0.167576			0.665079	0.853955	0.898338	1.33587	1.07011	0.996335	0.775053
	0.900031	0.995771	1.09137	1.00419	1.0111	1.1944	0.775154			0.491524	0.551339	0.557172	0.538327	0.418861	0.261203	0.261256
	0.572115	0.736367	1.22979	1.90865	1.67276	1.07594	0.389111			0.542732	0.688344	0.545142	0.618407	0.49692	0.441683	0.287964
	0.494255	0.460391	0.590768	0.44689	0.508205	0.59206	0.336287			0.439208	0.339931	0.40637	0.473906	0.747481	1.81563	1.39067
	0.418753	0.494408	0.491796	0.454492	0.485014	0.375636	0.274081			1.02027	1.21195	1.09788	0.759383	0.74029	0.50298	0.508271
	0.698068	0.977519	1.18291	1.08732	1.13799	1.01559	0.627115			0.528516	0.602654	0.645656	0.670536	0.819935	0.491331	0.56338
	0.523425	0.559879	0.506955	0.588568	0.565917	0.468664	0.274574			0.384915	0.478021	0.42928	0.408708	0.305383	0.377376	0.370558
	0.582915	0.875197	0.675191	0.732177	0.673834	0.56907	0.447888			0.345269	0.392696	0.460299	0.347864	0.370024	0.353932	0.297008
	0.452767	0.508387	0.367124	0.417621	0.463684	0.408313	0.465259			0.755225	0.776125	0.600898	0.463269	0.370547	0.315828	0.145366
	0.721124	0.50985	0.50496	0.254668	0.345994	0.353361	0.556482			0.415409	0.593916	0.756274	0.776556	0.560795	0.663081	0.522641
	0.614364	0.770561	0.432931	0.436069	0.525616	0.545618	0.571935			0.585983	0.518403	0.578889	0.414449	0.544761	0.374871	0.283284
	0.48406	0.415048	0.393579	0.33599	0.360154	0.305279	0.332165			0.508691	0.449116	0.417357	0.222423	0.302071	0.299271	0.242201
	0.606254	0.497294	0.531298	0.478187	0.470483	0.490845	0.618227			0.533158	0.487965	0.337864	0.34147	0.215605	0.148069	0.188225
	0.591976	0.632122	0.694531	0.799069	0.756869	0.512799	0.431572			0.659418	0.528288	0.563006	0.423137	0.338298	0.390775	0.386247
	0.523149	0.449678	0.34522	0.319381	0.267928	0.166487	0.269803			0.553949	0.29748	0.239316	0.165983	0.215172	0.157099	0.312845
	0.53339	0.463848	0.485667	0.587921	0.458278	0.333449	0.197206			0.445833	0.36704	0.388696	0.34096	0.376347	0.387527	0.374553
	0.444561	0.412867	0.473588	0.392323	0.419514	0.351998	0.32195			0.492245	0.5993	0.838564	0.846952	0.646833	0.489658	0.360521
	2.2458	2.0422	1.8826	1.73506	1.79397	1.78355	2.4451			0.581373	0.903766	1.2472	0.782762	0.489072	0.0176988	-0.026624
	0.5542	0.77361	0.593768	0.596288	0.4557	0.327122	0.265356			0.455555	0.413027	0.583035	0.320259	0.102091	-0.0263678	0.00373491
	0.412328	0.449799	0.52806	0.490976	0.340918	0.43229	0.329991			0.817908	1.27201	1.72175	1.4411	0.721661	0.225727	0.0846683
	0.462417	0.48768	0.476205	0.482161	0.332517	0.459548	0.460645			0.753875	0.84501	0.896692	0.704728	0.473362	0.263304	0.107645
	0.474928	0.482342	0.506175	0.457719	0.451336	0.520816	0.570025			0.516036	0.670366	0.605772	0.52222	0.246882	0.220958	0.133332
	0.670621	0.589408	0.39982	0.533405	0.760316	0.979194	1.08209			0.680688	1.25564	1.74192	1.21732	0.627828	0.408762	0.0782986
	0.699101	0.836871	0.826508	0.78828	0.799475	0.707811	0.563976			0.88872	0.602102	0.543982	0.62188	0.655396	0.969113	1.17337
	0.519602	0.44505	0.558022	0.491269	0.532658	0.57001	0.575413			0.546573	0.587547	0.5896	0.514566	0.39413	0.0742544	0.118959
	0.568078	0.527534	0.693461	0.626253	0.673995	0.671982	0.460521			0.914415	1.05972	0.835622	0.855791	1.07444	0.829857	0.718
	0.51986	0.594957	0.428398	0.418623	0.555224	0.677655	0.666802			0.586882	0.860668	1.45085	1.08432	0.716236	0.79202	1.10511
	0.953103	0.97287	0.796992	0.637589	0.387383	0.389058	0.622372			0.622928	0.722305	0.586351	0.470502	0.371309	0.331898	0.216698
	0.467489	0.47677	0.417974	0.299046	0.251277	0.260674	0.33643			0.741602	0.651445	0.547025	0.437655	0.28502	0.239951	0.378542
	0.873194	0.931183	1.08445	0.858629	0.541251	0.148377	0.149799			0.65201	0.735133	0.812758	0.561305	0.712726	0.499932	0.604731
	0.461762	0.578613	0.679141	0.526755	0.283902	0.0587004	0.0523597			0.150095	0.0691271	0.227504	0.373756	0.200789	0.0754076	0.0361761
	0.652975	0.763216	0.660864	0.769589	0.735498	0.761212	0.726393			0.797784	1.58494	1.46785	1.85682	1.62084	1.00161	0.945999
	0.65077	0.979299	0.928104	1.03788	1.17311	1.03546	0.847331			0.555889	0.309518	0.36838	0.141602	0.197436	0.325351	0.389681
										0.550952	0.835214	0.847904	0.583199	0.282662	0.461253	0.149035
										0.478937	0.165075	0.186493	0.289997	0.150199	0.0839449	0.192919
										0.812958	0.81392	1.18929	1.28929	0.933731	0.57214	0.786951
										1.07816	0.60476	0.798571	0.596761	1.22259	1.27292	1.33093
										0.638659	0.61333	0.702965	0.599803	0.528757	0.412577	0.470668
										0.722032	0.457836	0.325142	0.335066	0.464356	0.469809	0.449059
										1.08654	0.675828	0.755455	0.587877	0.608188	0.485062	0.5933
										0.739225	0.606925	0.597021	0.709934	0.547929	0.588641	0.692727
										0.820882	0.629246	0.47446	0.402204	0.356271	0.368083	0.499777
										0.624093	0.612394	0.540207	0.39012	0.264626	0.30755	0.406019
										0.801666	0.88213	0.691091	0.847331	0.584484	0.659777	0.531515
										0.659598	0.627131	0.567521	0.610951	0.658077	0.651071	0.705612
										0.66028	0.669458	0.476058	0.388699	0.217204	0.0930894	0.124551
										1.06643	1.38754	1.71274	1.63965	0.878656	0.179832	0.421245
										0.625101	0.595697	0.703029	0.688262	0.848098	0.754155	0.758373
										1.30075	1.36527	1.4112	1.60778	1.53072	1.12439	0.959431
										0.48113	0.61914	0.683694	0.451644	0.618947	0.61752	0.587573
										0.683465	0.872049	0.899065	0.961272	0.874424	0.82113	0.745766

## Sheet: Figure 5C-D and 5S1
P37-40				P44-47				Adult
Zp	Zc	Pattern Index		Zp	Zc	Pattern Index		Zp	Zc	Pattern Index
3.57026	12.0209	-8.45059		8.30989	4.32392	3.98597		1.78152	13.1998	-11.4183
4.08523	16.5347	-12.4494		0.951699	9.62956	-8.67786		-1.82953	16.2297	-16.2297
-0.518157	9.54636	-9.54636		3.30412	10.1962	-6.89204		-1.11687	12.2842	-12.2842
3.50548	8.8232	-5.31772		3.9925	12.9211	-8.92863		2.98189	7.81665	-4.83476
-2.05224	12.888	-12.888		12.5412	1.46385	11.0774		-1.89047	11.3594	-11.3594
-0.73343	10.5316	-10.5316		3.18449	9.37549	-6.191		-0.107925	10.7597	-10.7597
4.25202	6.81899	-2.56696		5.59094	9.576	-3.98506		0.368548	9.94586	-9.57731
2.80985	12.9783	-10.1685		3.15184	4.13607	-0.984231		1.27124	5.66105	-4.38981
0.0480801	13.9299	-13.8818		3.43543	15.1787	-11.7433		1.31268	15.896	-14.5833
0.815325	14.4834	-13.6681		1.73027	12.4634	-10.7331		5.17008	7.24078	-2.0707
0.494395	12.7028	-12.2084		1.71469	13.6481	-11.9334		3.09441	7.11013	-4.01572
0.274135	9.17194	-8.8978		0.914368	8.96257	-8.0482		2.17356	11.7948	-9.62127
0.663326	10.3035	-9.64017		3.02131	5.5886	-2.56729		-0.251565	10.2856	-10.2856
3.53514	6.60118	-3.06604		2.57344	6.35206	-3.77862		0.584045	11.2103	-10.6262
5.49403	10.31	-4.816		9.30191	7.17705	2.12487		1.98358	14.4738	-12.4902
1.16461	10.267	-9.10234		8.88705	4.67932	4.20773		3.34613	13.7401	-10.3939
2.33384	11.8501	-9.51626		4.72815	7.92986	-3.20171		-0.170193	10.3528	-10.3528
0.655511	13.368	-12.7125		4.12441	12.371	-8.24657		-1.72	7.29586	-7.29586
4.04186	10.7721	-6.73027		5.3437	14.1286	-8.78489		-0.120834	13.0474	-13.0474
1.95615	16.5963	-14.6402		3.13137	6.61973	-3.48836		2.07438	10.5005	-8.42607
6.97421	3.60681	3.3674		3.79057	8.36021	-4.56963		2.73145	12.7606	-10.0291
3.98312	11.7603	-7.77719		3.38614	12.8049	-9.41879		-0.26147	4.6522	-4.6522
1.39438	11.4824	-10.088		1.29901	15.4188	-14.1198		0.990399	7.84922	-6.85883
4.0032	4.085	-0.0818094		-0.855552	8.76559	-8.76559		3.43228	8.03912	-4.60684
3.15465	4.10277	-0.948114		2.71733	2.23545	0.48188		3.4789	13.627	-10.1481
3.18743	8.58103	-5.3936		0.887028	10.617	-9.72995		2.93959	5.58718	-2.6476
4.74638	6.6521	-1.90573		0.157028	4.86018	-4.70315		4.04909	8.29653	-4.24744
5.18685	9.85078	-4.66393		4.06231	12.8576	-8.79526		1.8874	7.48728	-5.59988
2.21087	10.7116	-8.50071		2.43754	13.6917	-11.2542		0.777307	15.5645	-14.7872
3.46709	11.6161	-8.14898		3.91909	5.38816	-1.46907		0.486386	13.7484	-13.262
5.24164	7.01048	-1.76884		5.31398	8.17969	-2.86571		5.83079	4.12167	1.70912
3.87423	6.05223	-2.178		1.42267	9.96111	-8.53844		0.983685	9.84781	-8.86413
-0.784552	9.55581	-9.55581		6.67871	2.40852	4.27019		3.87635	11.251	-7.37462
2.09106	5.6929	-3.60183		3.13575	12.9409	-9.80519		0.95226	5.21503	-4.26277
2.84369	11.8612	-9.01751		5.58637	7.61569	-2.02932		4.19861	13.5539	-9.35528
2.21817	15.9263	-13.7082		9.77204	4.26421	5.50783		2.07696	4.26384	-2.18688
2.06378	12.7089	-10.6451		0.211266	9.35799	-9.14673		3.41109	3.57715	-0.166063
2.62765	12.0456	-9.41797		1.42792	10.3073	-8.87938		1.22584	9.42059	-8.19475
1.53019	11.6738	-10.1436		2.73118	11.225	-8.49384		4.58672	6.38693	-1.80021
-1.55889	11.2319	-11.2319		0.123975	8.66015	-8.53618		2.14986	10.5644	-8.41453
3.35236	14.0958	-10.7435		2.41808	5.61309	-3.195
1.15606	14.3676	-13.2116		1.57689	3.55289	-1.976
5.24507	11.1924	-5.94733		1.53066	11.3882	-9.85755
4.84838	8.9534	-4.10502		0.982185	11.456	-10.4738
0.921414	13.6726	-12.7512		-0.926496	8.47549	-8.47549
2.86279	12.8841	-10.0214		3.41903	7.88037	-4.46134
1.40025	16.0674	-14.6671		2.19951	11.5753	-9.3758
-0.126836	5.97427	-5.97427		-1.75456	7.45288	-7.45288
2.06869	14.4417	-12.373		8.41848	6.18268	2.2358
6.3824	9.44587	-3.06347		2.96794	9.19398	-6.22604
5.59861	11.1462	-5.54763		1.01687	4.55843	-3.54156
4.37136	3.56247	0.808897		7.22977	6.15634	1.07343
2.07545	13.9822	-11.9068		10.1949	2.45267	7.74227
0.6609	15.9237	-15.2628		10.0136	4.5622	5.45143
8.01781	7.3652	0.652615		6.08215	14.6114	-8.52927
5.97749	7.52773	-1.55024		8.95568	5.1357	3.81999
-0.0465543	11.3115	-11.3115		5.6076	5.80961	-0.20202
-1.61624	9.44982	-9.44982		6.92662	9.46065	-2.53403
2.02512	7.56095	-5.53583		5.40067	4.89544	0.505223
-0.180004	15.1217	-15.1217		5.00629	8.37541	-3.36912
3.56196	8.3002	-4.73824		1.04223	17.59	-16.5478
5.53595	6.52159	-0.985638		7.61694	6.73513	0.881811
-0.00300094	12.9086	-12.9086		3.08396	14.5239	-11.4399
0.60246	10.2696	-9.66715		5.31619	10.7118	-5.39556
-1.72895	11.3584	-11.3584		5.82693	7.14494	-1.318
0.211954	16.9917	-16.7797		2.65205	6.18333	-3.53128
6.38879	5.1266	1.26219		4.15906	6.65821	-2.49916
2.87372	12.6144	-9.74064		3.85441	8.10429	-4.24988
-0.196465	11.1786	-11.1786		5.949	9.03273	-3.08373
-1.78726	13.0754	-13.0754		2.53606	6.28597	-3.74992
-0.262932	9.55605	-9.55605		3.84135	12.1243	-8.28291
3.16609	10.8229	-7.6568		0.633918	11.146	-10.5121
1.97191	13.2724	-11.3005		1.75283	9.63061	-7.87778
5.13444	12.0219	-6.88744		0.0734966	8.31361	-8.24012
4.45111	11.4093	-6.95822		1.51921	7.52952	-6.01031
5.31435	14.8038	-9.48943		2.76791	9.84057	-7.07266
3.90124	15.3307	-11.4294		2.90793	7.65032	-4.74239
-0.454227	12.156	-12.156		5.03422	10.4431	-5.4089
2.06499	12.8105	-10.7455		5.47101	12.9422	-7.47123
7.32851	8.21002	-0.881519		1.9861	14.6004	-12.6143
0.214278	12.4952	-12.2809		5.40142	8.15383	-2.75241
1.91662	15.1018	-13.1852		8.77769	4.08339	4.69431
8.18545	5.6987	2.48674		5.34919	5.36605	-0.0168562
1.98063	12.3855	-10.4049		12.2946	6.15722	6.1374
2.5412	8.10693	-5.56572		6.3307	4.87153	1.45917
4.29694	12.0971	-7.80015		7.31972	5.41722	1.9025
2.25082	13.6087	-11.3579		7.61681	5.12342	2.49339
6.18731	7.39059	-1.20328		4.73109	9.26145	-4.53036
-0.698547	13.1338	-13.1338		11.7105	4.22313	7.48737
0.418531	13.1956	-12.7771		2.35932	10.68	-8.32067
1.50895	14.0021	-12.4932		1.18935	8.27217	-7.08282
3.53561	9.61511	-6.0795		4.26513	9.57951	-5.31438
-0.710012	11.7503	-11.7503		5.12407	11.4709	-6.34682
9.11283	2.53186	6.58098		4.94795	12.4036	-7.45562
8.09737	0.668975	7.4284		-0.132583	6.81765	-6.81765
5.67626	5.79098	-0.114719		1.31978	11.8441	-10.5243
0.807248	9.08265	-8.2754		5.19524	8.5135	-3.31826
				3.1142	6.88755	-3.77335
				1.68719	15.2786	-13.5914
				4.13097	5.62926	-1.4983
				2.77654	11.7424	-8.9659
				0.578222	5.89723	-5.319
				1.39186	14.3174	-12.9255
				2.24842	15.0633	-12.8149
				5.08429	14.1068	-9.02255
				6.72382	12.2643	-5.54051
				6.35104	9.82408	-3.47305
				4.56051	7.13939	-2.57888
				4.68785	13.2394	-8.55155
				9.05415	6.54435	2.5098
				3.89473	6.92648	-3.03175
				3.2448	11.8935	-8.64871
				3.6476	9.54353	-5.89593
				3.33861	8.23326	-4.89465
				0.94761	7.97011	-7.0225
