# Supplementary material for: Development of visual motion integration involves coordination of multiple cortical stages
Source: eLife. 2021 Mar 22;10:e59798. doi: 10.7554/eLife.59798 (PMC7984838; doi:10.7554/eLife.59798)
Supplement: Figure 7—source data 1. [file elife-59798-fig7-data1.xlsx]

## Sheet: Figure 7C, 7E and 8S1
P37-40	Includes cells with correlation <.5 which are excluded from Figure 7D-E									P44-47	Includes cells with correlation <.5 which are excluded from Figure 7D-E
Model parameter	I	Ke	Ki	Tpss	MxResp	Winh	Wexc	Correlation with data		Model parameter	I	Ke	Ki	Tpss	MxResp	Winh	Wexc	Correlation with data
	0.12	5.06223	5.43327	1.25902	10.6673	0.12895	1.15734	0.823425			1.25569	-0.590389	-0.273673	1.12014	11.7144	10.3535	9.16878	0.769583
	1.95218	5.01994	3.41516	1.2989	13.3486	3.86267	1.16936	0.871974			1.22279	5.95157	4.75562	0.801953	6.27735	1.53654	1.01799	0.781979
	0.907393	4.3987	5.87004	1.21988	9.67037	0.928544	1.40569	0.859366			0.1371	2.63118	3.14413	1.88556	6.08074	0.298792	2.62202	0.909567
	1.00213	5.86677	5.98398	1.02062	4.13324	1.01833	1.02355	0.788762			0.463434	2.21751	-0.493197	1.12922	20.0476	4.11839	3.05256	0.834942
	0.120018	-0.571848	3.77511	2.46026	2.90022	0.209084	9.11513	0.428068			1.20684	1.64622	-0.943493	0.234039	14.1399	12.2693	3.79535	0.868075
	0.127972	5.77196	-4.65161	0.850218	6.5232	1.96847	1.03123	0.693486			0.223107	4.94664	-2.17261	0.58986	6.78398	2.89486	1.19147	0.606095
	0.205498	5.09098	-2.42298	1.03114	2.41051	2.7524	1.14947	0.73974			0.179368	1.10746	0.570962	2.92539	14.2068	1.06071	4.7196	0.944668
	1.16819	-0.356055	1.05448	1.48821	3.9926	5.63642	8.4862	0.771599			0.734361	5.99768	4.57005	0.759781	9.07135	0.976579	1.01544	0.65104
	1.63177	0.238977	3.77107	1.47104	12.2035	2.84677	6.78218	0.669679			0.120002	5.99886	5.84378	0.877299	3.73711	0.123033	1.01538	0.372519
	0.160233	5.20867	-4.25243	1.22465	8.62364	2.43436	1.11986	0.780836			0.174961	1.90876	-1.99895	0.958797	5.29361	2.21401	3.42886	0.815333
	0.525196	4.6886	1.95462	1.22891	26.8994	1.76965	1.28193	0.860926			0.173713	2.84596	4.48174	1.22467	7.90717	0.237635	2.42575	0.678435
	0.120002	5.99979	1.10236	1.03493	5.85597	0.567561	1.01533	0.764666			0.121868	2.40631	4.02848	1.73539	8.89453	0.194303	2.84672	0.67141
	0.12	5.97887	-3.94028	1.04561	4.57529	1.80082	1.01644	0.63187			0.80026	-3.75968	0.28691	3	2.74911	5.3231	14.8816	0.214985
	0.12055	-4.98176	4.13386	1.95648	3.17664	0.185326	15.5054	0.367148			2.08547	5.87355	5.8648	0.880905	4.09076	2.13487	1.02306	0.395745
	0.12006	0.0106984	-3.71842	2.23994	11.1065	1.783	7.42158	0.836709			0.599333	4.67504	0.914253	0.562644	5.87197	3.06685	1.28722	0.76654
	1.27911	-1.89932	0.233844	1.39263	3.87784	8.69317	12.4585	0.862962			0.541682	4.25012	0.559218	0.65897	5.33823	3.2191	1.47746	0.859768
	0.436881	5.40188	1.69611	0.518486	6.57417	1.62607	1.08005	0.738383			1.19225	1.92434	1.00914	0.936257	4.90938	5.86261	3.40856	0.684308
	0.132714	5.9611	-3.5001	1.21145	10.3416	1.94761	1.01744	0.772005			2.06284	5.45839	4.25245	0.569818	4.42588	3.04536	1.07039	0.827936
	0.876611	-4.50431	-0.558387	2.31177	7.22508	7.95622	15.3177	0.720845			0.886118	-0.557002	2.39357	2.74859	4.9702	2.53438	9.07211	0.626157
	0.12003	-2.0539	2.95743	3	6.77399	0.279704	12.7586	0.278042			1.28493	-4.58495	0.129295	1.44531	9.19842	9.10503	15.3537	0.629272
	0.272811	2.84683	-2.99984	0.820494	9.41835	3.86709	2.425	0.793417			0.75883	-1.69471	-1.70858	1.07739	3.38574	9.15151	12.0298	0.724775
	0.12	5.95179	-1.02222	0.757956	7.86558	1.24567	1.01798	0.597724			0.377839	2.12975	0.436224	1.40635	26.9318	2.36365	3.15419	0.969557
	0.12	4.7421	0.718909	0.944828	3.75104	0.666782	1.2616	0.611413			0.552269	-4.89032	2.92081	2.49595	13.9661	1.30401	15.4739	0.176116
	0.124459	5.99992	-4.10539	1.15204	9.28299	1.88053	1.01532	0.69942			0.417346	0.964331	-3.93377	0.942801	8.73983	6.26127	5.01053	0.818613
	0.12	-0.0797825	2.0278	2.3139	7.79601	0.39329	7.68143	0.725781			1.36355	0.0383083	4.84259	1.92393	4.69713	1.67118	7.3429	0.777926
	1.11606	-2.25773	-0.552405	2.4284	20.1182	10.1101	13.1233	0.814224			0.712157	3.65473	1.91419	0.820365	14.456	2.43684	1.81763	0.767037
	0.120006	2.07656	2.49315	1.79545	12.7163	0.330913	3.21777	0.926223			0.33386	0.48094	1.9155	1.963	5.05416	1.14182	6.14047	0.781195
	0.199205	5.97656	-3.3278	0.962619	7.05477	2.8923	1.01657	0.740929			1.27925	0.49162	0.89269	1.06237	6.10129	6.60578	6.11319	0.679895
	0.378865	2.96254	-1.86852	0.701951	5.96647	4.69652	2.32601	0.6484			2.12	-3.28183	2.73751	2.91485	8.49263	5.34822	14.4748	0.283748
	0.12	5.9905	5.61933	1.49033	14.5664	0.125691	1.01582	0.804224			0.705675	3.70445	1.9994	0.879455	2.93509	2.33775	1.78601	0.712894
	0.284506	1.90574	1.35595	1.39482	10.4671	1.2124	3.43282	0.930649			1.06773	5.02212	5.40377	0.828573	4.35793	1.15285	1.16873	0.85432
	0.142479	5.12978	0.180379	0.650504	3.54782	0.989325	1.13925	0.771363			0.12	6	4.46044	1.28669	18.4597	0.165298	1.01532	0.859669
	0.12	5.93871	4.44407	1.0942	6.03958	0.166183	1.01876	0.568265			0.830758	0.696369	-0.218642	1.14968	6.59033	6.71636	5.6096	0.790098
	0.358059	2.34525	1.323	1.43651	7.59834	1.5464	2.91148	0.912522			1.07317	-1.76592	1.13088	2.48721	3.32662	5.01589	12.1831	0.443909
	0.266501	4.28911	3.70926	1.09276	7.5378	0.475166	1.4581	0.887832			1.2802	-4.38374	-1.39384	1.93229	5.16287	14.5114	15.2604	0.73695
	0.120127	0.689658	-2.97522	1.84911	6.78464	1.69936	5.62549	0.80642			0.458571	5.88825	2.05684	0.790434	4.56909	1.48656	1.02203	0.818778
	0.12	4.72717	-2.27749	0.880986	4.1627	1.57882	1.26719	0.816013			0.68207	5.46993	3.56902	1.06983	8.3413	1.2779	1.06853	0.850992
	0.43767	0.505707	-1.65788	0.907294	4.60494	5.22965	6.07736	0.852882			1.065	0.14659	1.54502	0.856537	3.36362	4.20673	7.03766	0.762641
	0.136216	0.096701	2.30815	1.32419	2.57628	0.402061	7.17758	0.521796			0.434102	5.71354	1.39488	0.778341	5.35435	1.82096	1.03684	0.75873
	0.12	6	3.58176	1.29221	21.4731	0.223816	1.01532	0.824203			0.977528	5.35429	5.16816	1.47145	4.56939	1.1042	1.08887	0.855709
	0.12	4.98425	4.5608	1.18046	11.9817	0.160048	1.17992	0.861252			2.10268	-0.86794	1.53944	2.9999	3.13776	8.32401	9.95777	0.696956
	0.12	5.6218	-1.27425	0.690616	4.84722	1.32468	1.04712	0.606347			0.616169	3.88806	0.562998	0.643353	3.35654	3.65596	1.67439	0.773149
	0.26328	5.34822	-0.295147	0.631207	7.47797	2.18735	1.09004	0.718727			1.50713	-2.04933	0.678684	1.78551	4.51951	8.51766	12.75	0.554766
	0.12	5.32817	4.76826	0.695366	5.71193	0.150234	1.09398	0.804203			0.12	2.98083	5.55733	1.27146	16.4008	0.126661	2.31077	0.839079
	1.6139	5.5561	5.96996	0.909983	4.08383	1.64123	1.05568	0.558047			1.09337	-1.06168	0.426054	1.57162	8.73418	6.86871	10.4865	0.847024
	0.887276	-1.85641	0.181564	2.08673	9.98937	6.15801	12.3716	0.768311			0.568512	1.30518	-0.120138	1.26149	5.11579	4.43334	4.35034	0.894297
	0.12	5.99521	-0.511471	1.51348	8.49547	1.07278	1.01557	0.814065			0.12	5.99924	1.17837	2.0682	29.8721	0.549946	1.01536	0.948887
	0.280417	3.82187	-1.97604	1.37491	16.3166	3.53606	1.71371	0.896593			0.184711	5.22438	-2.0776	0.927119	10.125	2.36482	1.11622	0.812721
	0.217157	5.2239	1.24893	0.868527	8.75071	0.966704	1.11633	0.905016			0.563123	2.84984	3.39682	1.02306	6.83577	1.12151	2.42236	0.803879
	0.752497	2.09132	0.469956	0.661692	6.06889	4.64187	3.19997	0.920601			0.401931	3.15853	-1.43934	0.712122	7.30658	4.60013	2.16818	0.625506
	0.140318	4.67569	-1.48988	1.1099	5.20152	1.62278	1.28696	0.805004			0.409834	5.99885	0.412268	1.08847	13.0888	2.58937	1.01538	0.863871
	0.120002	-0.1959	-3.64788	2.46901	5.60087	1.77562	8.01832	0.634545			0.12	5.89372	-1.65147	1.8102	4.87045	1.43216	1.02165	0.942489
	0.12	-0.310557	3.69189	1.46299	6.42912	0.215273	8.35313	0.810423
	0.121226	-1.40137	-3.9955	1.48667	2.5679	1.82353	11.3536	0.397851
	0.12	0.534436	5.07225	1.93641	3.0431	0.138548	6.0048	0.644237
	0.219684	6	5.79875	1.6769	7.52929	0.226031	1.01532	0.868141
	0.120009	-1.39131	-3.76902	1.79117	3.58598	1.78675	11.3291	0.443239
	0.288477	5.26247	-0.800466	0.654889	4.1422	2.8181	1.10769	0.59616
	0.243398	5.41056	-1.0998	0.906114	14.6003	2.57706	1.07851	0.711719
	0.401272	0.647353	-0.23902	1.41265	13.2163	3.26799	5.72668	0.858465
	0.123834	0.598729	5.34886	1.14854	4.71442	0.134968	5.84504	0.577249
	0.120004	0.744989	5.85316	2.35395	9.12677	0.12295	5.4957	0.952899
	0.21449	5.3363	-2.60882	1.05883	3.76133	2.93255	1.09237	0.723246
	1.07418	3.89788	2.2735	0.654874	2.83464	3.21153	1.66865	0.607978
	0.12	5.99475	5.6952	1.40251	5.32017	0.124649	1.01559	0.64489
	0.138929	-2.83713	-2.26273	1.92218	1.91964	1.82438	13.9788	-0.0275371
	0.120009	5.95652	3.19765	1.20107	6.37222	0.256589	1.0177	0.844318
	0.136406	5.47881	-4.24828	1.0129	14.928	2.07205	1.06711	0.766565
	0.425469	4.70737	0.987364	1.0102	4.06604	2.11133	1.27471	0.787009
	0.716561	3.07044	1.23024	0.978378	5.63955	3.21445	2.23765	0.798099
	0.120059	-2.3956	-1.77136	1.80129	2.39671	1.46408	13.3505	0.0596581
	0.25306	5.10473	-1.57862	0.692899	10.8282	2.9787	1.1458	0.714205
	1.00721	2.16186	1.14721	0.819492	5.10045	4.67584	3.11655	0.826606
	0.158591	0.826041	-0.0934757	1.29903	6.84182	1.22448	5.3109	0.789936
	1.0376	2.22914	5.33652	1.1121	2.30385	1.13339	3.03939	0.625777
	0.12	5.98728	5.13722	0.733492	2.06898	0.136481	1.01599	0.0872364
	0.120001	5.87175	5.31721	0.892095	4.67314	0.131543	1.02319	0.581504
	1.42267	-2.3847	0.159415	1.87039	5.7894	9.96137	13.3331	0.615292
	1.03892	1.50756	1.99383	1.12712	5.05986	3.44896	4.0093	0.722932
	1.27856	-0.836905	0.254635	1.14638	2.43269	8.61672	9.87117	0.548465
	0.42159	5.2479	1.99692	0.986817	8.1099	1.39795	1.1109	0.802983
	0.12	3.97448	-2.5421	1.50236	2.47102	1.62904	1.6246	0.791204
	0.12	-0.404223	2.64585	2.14671	6.81781	0.312968	8.62704	0.683418
	0.180352	5.61399	-1.09132	1.40784	7.52548	1.90549	1.04808	0.821834
	0.599304	-0.119414	0.839715	1.51062	9.29624	3.16454	7.79606	0.932937
	0.12	5.99364	-3.7474	0.787027	3.58388	1.7847	1.01565	0.556293
	0.519143	0.3108	-0.731062	2.1438	7.58258	4.96947	6.58726	0.867561
	0.348862	4.54541	0.279151	0.970161	2.7568	2.32786	1.34027	0.713195
	0.157576	3.5198	4.00297	1.71779	18.7151	0.253471	1.90652	0.945716
	0.12	1.88892	3.78763	1.80552	9.67111	0.208134	3.45495	0.856083
	0.12	5.83866	4.66959	1.5638	8.75264	0.154723	1.02565	0.789651
	0.564546	1.46591	2.55947	1.61815	20.635	1.51944	4.07661	0.947479
	0.128643	1.86829	-0.910324	1.04998	2.0917	1.29611	3.48233	0.478767
	0.57483	3.93745	0.283514	0.471696	3.81499	3.82889	1.64572	0.933453
	0.554577	-0.32886	-2.23358	1.30517	9.2901	7.25492	8.40666	0.67558
	0.12	-1.77528	5.37147	3	6.46972	0.130274	12.2029	0.697914
	0.172796	3.38641	-1.18503	1.52852	9.13433	1.8681	1.99897	0.906015
	1.68563	-3.29676	0.159735	1.40231	6.61302	11.8011	14.4894	0.731792
	0.523773	5.03108	0.734138	0.615293	3.46883	2.89171	1.16614	0.692251
	0.205614	5.9998	-0.283289	0.866838	6.64445	1.70113	1.01533	0.827524
	0.12	0.38559	1.78432	0.981759	12.2632	0.431601	6.38813	0.538811
	0.120001	-0.862755	2.28347	2.67054	3.57249	0.357451	9.94334	0.493122
	0.243297	4.84791	-2.77699	0.522543	4.30525	3.38223	1.22379	0.684122
	0.665613	-0.405593	-2.2309	1.2045	4.07535	8.7044	8.63105	0.610706
	0.243616	5.44083	-0.774604	0.759209	10.1983	2.36209	1.0733	0.692405
	2.11744	5.96998	5.46678	0.544217	4.50717	2.26361	1.01694	0.39433
	0.258245	3.98031	-0.797164	0.506115	6.91163	2.52036	1.6213	0.70822
	0.551315	6	2.47148	0.822167	14.8544	1.53234	1.01532	0.822155
	0.142869	5.11828	-0.715133	0.816894	7.89094	1.36112	1.14223	0.745795
	0.161083	5.4445	-1.55619	0.734746	2.99261	1.88779	1.07269	0.552173
	0.294598	-0.0953636	4.53509	1.47665	3.13796	0.396142	7.72644	0.43317
	0.411088	2.98248	4.74159	1.01492	2.92718	0.518706	2.3094	0.788668
	0.121825	-3.60407	-0.344692	2.20881	1.79815	1.02978	14.7618	-0.0280286
	0.12	3.92702	4.44934	0.963875	1.87012	0.165897	1.65173	0.47024
	0.306193	5.56005	-0.508888	0.353955	6.62723	2.73503	1.05513	0.645629
	0.12	5.8195	2.87918	1.16952	8.26773	0.287624	1.02717	0.836845
	0.401562	4.40486	-0.0876892	0.94704	7.8376	3.09374	1.40283	0.618027
	0.12	6	3.07501	0.603132	3.00876	0.268078	1.01532	0.520278
	0.12	5.81226	-1.69792	0.829206	4.43325	1.44442	1.02776	0.580975
	0.28014	4.63278	-1.51723	0.974324	7.79294	3.25779	1.30401	0.668406
	0.324427	5.8574	2.85428	1.43507	9.82397	0.784622	1.02423	0.889942
	0.168519	5.79603	5.36943	0.980109	5.00515	0.183011	1.02912	0.749849
	0.741604	-0.741189	-1.27999	1.42043	9.30704	8.19729	9.60124	0.845886
	0.131316	5.99347	3.99032	1.32177	12.103	0.212162	1.01566	0.873878
	0.375866	5.23704	0.194694	0.861519	4.2228	2.59498	1.11334	0.803308
	0.423027	5.90424	0.84662	0.635044	11.0746	2.22724	1.02095	0.667754
	0.32014	3.16724	-3.72864	1.04141	16.5135	4.75683	2.16144	0.885998
	0.12	5.99758	2.6326	1.17323	15.3327	0.31448	1.01545	0.839833
	0.142013	4.68889	-2.42024	0.895109	6.98557	1.90149	1.28182	0.722473
	0.156545	4.42745	-0.120188	0.732229	24.5897	1.22079	1.39243	0.80792
	0.307264	2.25705	-1.7089	1.08546	10.0076	3.70582	3.00805	0.897011
	0.187541	2.08535	0.130231	1.00844	4.14172	1.32843	3.20715	0.787033
	0.180649	1.60908	2.17304	0.944558	2.74697	0.560656	3.85119	0.464673
	0.177177	2.10997	0.525148	1.79106	27.3059	1.06805	3.17765	0.938607
	0.334621	2.62479	3.16551	1.00357	8.9977	0.723711	2.62812	0.816851
	0.12	5.75091	0.69942	1.44924	16.2138	0.672286	1.03317	0.894058
	0.162241	2.68941	-3.76023	0.872533	10.087	2.41446	2.56713	0.736723
	0.12	5.43418	-1.49714	0.377162	3.12474	1.38986	1.07442	0.72851
	0.403237	4.75674	2.71044	0.688229	4.32273	1.0273	1.25617	0.783329
	1.23893	-2.20949	-0.954144	1.62216	19.1898	12.6317	13.0401	0.805779
	0.120003	5.9406	0.0821043	0.477598	2.23545	0.86627	1.01865	0.184082
	0.437182	5.06403	4.20559	0.883146	6.4684	0.655782	1.15684	0.922842
	1.21591	0.817363	5.7237	1.42248	5.71723	1.25946	5.33038	0.831561
	0.243168	5.04918	0.0365887	1.16799	8.4413	1.78675	1.16099	0.848398
	0.12	5.97334	-1.72469	1.43284	9.38967	1.45139	1.01675	0.92841
	0.479633	3.54305	0.705125	0.793383	9.24064	2.68063	1.89087	0.886052
	0.522895	-1.54895	-1.3718	1.43394	4.23642	5.89905	11.7027	0.432047
	0.163331	1.06441	0.978219	1.09049	5.18848	0.813618	4.80497	0.715818
	0.390546	0.127447	-1.99924	1.48239	6.81367	4.94229	7.0912	0.826032
	0.12	0.410691	3.90847	1.86552	10.8086	0.199497	6.32223	0.842521
	0.12	5.99943	0.970732	0.890888	8.54009	0.59965	1.01535	0.828755
	0.195963	3.98367	-2.18374	0.878885	5.26011	2.54653	1.61941	0.86661
	0.12	5.95346	1.36552	1.20404	6.1789	0.509388	1.01788	0.676864

## Sheet: Figure 7D
P37-40			P44-47
Empirical pattern index	Model fit pattern index		Empirical pattern index	Model fit pattern index
-8.42109	-13.8239		15.9573	27.6752
7.5855	8.70562		2.9329	5.48313
-4.73659	-2.01874		-0.99064	-6.83311
-6.94098	1.91799		-1.7019	3.42343
-13.4559	-19.7812		1.42709	18.3218
1.97176	-6.79395		-1.63119	-9.32898
3.7661	10.5287		-0.00564623	1.50478
-0.401496	4.62184		-5.4973	-1.69858
-6.44734	-10.3974		-11.8332	-20.164
10.7401	5.04259		-2.58417	-13.744
-10.1939	-16.5307		7.07506	-8.64811
-8.91482	-16.3676		11.3848	11.1077
-6.39062	-8.77078		9.20544	10.5958
2.25802	-0.254835		9.58215	21.8368
-14.5326	-3.79271		13.9298	9.69102
-11.1702	-13.4989		1.49429	7.01969
-2.55003	-7.27713		-2.88568	-8.96624
-6.85994	-12.2485		-4.1732	-14.4126
-14.7106	-20.2654		-1.80612	-3.06821
-5.75017	-19.1208		-0.906021	-2.94829
-19.1075	-14.687		1.02401	0.432315
-1.03551	-8.50728		9.40835	6.51699
7.70683	9.48478		-4.71605	-4.22681
-3.90687	-10.1004		9.09003	28.0259
-14.6255	-5.73109		5.54819	6.04914
-16.8213	1.0055		-5.1312	1.72394
-9.62438	-10.4956		-11.1881	-10.301
-3.59217	-11.1754		19.9848	19.7391
-7.91106	-21.159		2.43507	9.0137
-11.6137	-15.628		4.84333	0.611093
-0.280918	-6.38011		-4.49697	1.64475
-9.12695	-15.4725		1.56611	-3.91079
-5.53372	-10.8054		-1.05317	2.87572
-5.61863	-19.7663		1.91379	0.264611
-4.11909	-13.6649		-1.08185	23.7367
-2.89309	-14.4375		5.13106	12.4793
-12.5588	-12.8492		-4.70379	8.5808
-8.39022	-15.0266		-12.6172	-13.1874
-11.6689	-20.9816		0.694244	4.34891
-15.7152	-10.2679		7.04642	4.94599
-7.73188	-21.1174		-7.9593	-5.43229
-1.45058	9.14911		-10.8665	-10.3116
0.572676	-3.63853		-2.54093	-9.55925
-3.38072	-10.2417		-0.0150692	8.03591
-2.67326	3.61037		5.36832	4.51926
-10.6229	-16.8003		-6.97823	-6.68367
-1.30371	8.6977
-2.45005	-16.3259
-3.86541	-7.94563
-6.00937	-11.7569
-5.87094	-10.1853
-13.4126	-7.32585
-7.60573	-2.39727
-7.70565	-3.92122
-8.63406	-7.49964
-8.38809	-16.7751
-1.0044	-6.30018
-10.2236	-3.02296
7.81077	17.1567
-11.6211	-11.4951
-9.02783	-14.074
-11.3805	-17.1593
-2.75745	3.24371
2.15641	10.2611
-8.40112	-4.88937
0.0431602	21.3267
-7.24219	-16.5523
0.0310319	-8.58849
-3.47782	-18.9751
10.2506	9.77499
1.15721	13.9419
-0.953165	13.6862
5.97882	-1.06889
1.35265	-11.7785
-6.64333	-9.33783
-5.56303	-6.38279
-0.552359	-6.51954
-8.5381	-19.9887
5.11953	6.69273
-3.53949	-0.826004
-11.3851	-9.1193
-4.49175	-10.155
-5.00208	-9.73568
7.00161	-2.04027
3.68977	13.7596
2.91161	-6.4728
-6.21704	-6.05538
-2.15699	-9.40137
-6.36455	7.2326
1.6499	12.3108
-11.6782	-13.1262
-8.03376	-16.7252
-9.09096	-7.01423
1.14164	1.7051
-6.58738	-8.23551
-5.95785	-17.059
-2.91669	4.67579
-6.02629	-21.155
-6.54882	-20.7474
-3.56051	-19.2208
-15.0806	-6.89471
-5.17044	-14.56
-6.20287	8.35298
-8.70118	-21.5006
-10.7306	-19.6379
1.409	2.16759
-8.4377	-3.99965
-5.75876	-17.3489
-2.1832	-0.466811
-15.6723	-12.3379
6.45322	6.66088
-8.4484	6.5176
-1.00642	5.6664
-11.7776	-14.4538
-8.76563	-20.4981
-15.2889	-23.3258
1.25471	-8.90794
-6.34803	-20.8837
-2.7728	-8.30273
-6.03326	-19.5388
-9.3119	-11.0138
-4.43559	-23.0781
-7.04057	-21.7566
-5.67799	-11.5907
6.04353	17.2564
-4.02632	-12.82
0.235841	-5.83519
-5.99229	-6.00586
-3.80459	-11.1461
-10.2535	-2.00348
-9.27575	-18.6064
-3.26229	-9.14558
-14.0383	-10.8955
-13.9842	-18.9469
-4.78054	-16.5458
-11.1595	-14.0339
