# Supplementary material for: Development of visual motion integration involves coordination of multiple cortical stages
Source: eLife. 2021 Mar 22;10:e59798. doi: 10.7554/eLife.59798 (PMC7984838; doi:10.7554/eLife.59798)
Supplement: Figure 8—source data 1. [file elife-59798-fig8-data1.xlsx]

## Sheet: Figure 8 and 8S1B
Baseline model		Increased inhibition			Increased excitation			Changed V1		Combined changes
Pattern index		Pattern index	New Winh		Pattern index	New Wexc		Pattern index		Pattern index
-23.3258		-22.2686	0.225404		-23.1181	1.17522		-20.8527		-24.4491
-23.0781		-18.6341	0.228524		-23.0658	1.17522		-19.9716		-19.7222
-21.7566		-17.3997	0.230433		-23.0403	1.17522		-19.3828		-16.0006
-21.5006		-16.8694	0.236408		-22.5816	1.17522		-18.4796		-15.2575
-21.159		-15.7549	0.238835		-22.3928	1.17524		-18.4652		-14.8744
-21.155		-15.3233	0.241161		-22.3358	1.17528		-17.1403		-14.7026
-21.1174		-14.7101	0.24396		-22.1441	1.17528		-17.0973		-14.5816
-20.9816		-14.4858	0.254005		-22.1079	1.17538		-16.921		-12.7881
-20.8837		-14.2049	0.275429		-21.8312	1.17593		-16.863		-12.5756
-20.7474		-12.0496	0.283658		-21.6376	1.17664		-16.7301		-11.7022
-20.4981		-11.7598	0.291611		-21.1145	1.17678		-16.5175		-11.3754
-20.2654		-11.7251	0.293421		-20.8313	1.17711		-16.429		-11.2551
-19.9887		-11.5874	0.30467		-20.7953	1.17716		-16.2237		-10.6113
-19.7812		-11.0882	0.32892		-20.6232	1.17805		-15.9288		-10.4984
-19.7663		-9.89688	0.365745		-20.6034	1.18155		-15.6522		-10.0016
-19.6379		-8.80274	0.373728		-20.5019	1.18225		-15.4327		-8.57482
-19.5388		-8.69377	0.38158		-20.3462	1.18323		-15.3283		-7.91942
-19.2208		-8.49183	0.394667		-20.2263	1.18698		-15.1581		-7.8904
-19.1208		-8.4648	0.410329		-20.1969	1.1884		-15.0766		-7.77165
-18.9751		-7.97855	0.414327		-19.9728	1.18935		-14.9369		-7.73366
-18.9469		-7.66696	0.470397		-19.9577	1.18986		-14.6586		-7.62839
-18.6064		-7.38125	0.491476		-19.8886	1.19396		-14.227		-7.61562
-17.3489		-7.01079	0.527311		-19.5411	1.205		-14.2003		-7.59233
-17.1593		-6.90034	0.573775		-19.4595	1.21572		-13.8394		-7.28397
-17.059		-6.83045	0.576547		-18.8332	1.21739		-13.6564		-6.96901
-16.8003		-6.77049	0.606659		-18.7201	1.22056		-13.3752		-6.96798
-16.7751		-6.4343	0.644885		-18.689	1.22697		-13.3485		-6.8633
-16.7252		-6.03019	0.653464		-18.6516	1.23362		-13.3066		-6.8525
-16.5523		-5.88465	0.697226		-18.4273	1.23617		-13.1903		-6.71936
-16.5458		-5.82025	0.721033		-17.973	1.24192		-13.0451		-6.58742
-16.5307		-5.50081	0.791269		-17.8226	1.2506		-12.9236		-6.51596
-16.3676		-5.15909	0.805783		-17.3043	1.25833		-12.8346		-6.41203
-16.3259		-5.01625	0.933877		-17.263	1.30845		-12.6757		-6.04818
-15.628		-4.86425	0.939989		-17.1528	1.31163		-12.5715		-5.93369
-15.4725		-4.732	1.02647		-16.4097	1.33405		-12.5211		-5.93305
-15.0266		-4.45319	1.03087		-16.3286	1.33572		-12.093		-5.90207
-14.687		-4.31276	1.04052		-15.9481	1.36928		-11.7981		-5.78971
-14.56		-3.91131	1.09936		-15.749	1.38467		-11.4986		-5.67805
-14.4538		-3.73425	1.11995		-15.3834	1.38633		-11.3962		-5.59201
-14.4375		-3.24297	1.22243		-15.3794	1.38935		-11.319		-5.18189
-14.074		-3.23471	1.23252		-15.3695	1.40019		-11.0689		-5.17763
-14.0339		-2.73264	1.24263		-15.3211	1.40421		-11.0423		-5.01841
-13.8239		-2.5877	1.28206		-15.167	1.42946		-10.9644		-4.5346
-13.6649		-2.40304	1.31176		-15.119	1.43517		-10.7842		-4.48541
-13.4989		-1.81148	1.36304		-14.9996	1.43908		-10.6554		-4.42752
-13.1262		-1.1457	1.41187		-14.7544	1.47129		-10.4322		-4.16323
-12.8492		-1.10783	1.63854		-14.7146	1.47858		-10.2537		-4.06402
-12.82		-0.829025	1.67087		-14.2517	1.48404		-10.1426		-3.53812
-12.3379		-0.484545	1.68369		-14.0436	1.49068		-9.91097		-3.4275
-12.2485		0	1.72954		-13.8919	1.49844		-9.79938		-2.81078
-11.7785		1.22236	1.74293		-13.6096	1.5395		-9.70257		-2.71911
-11.7569		1.59245	1.78858		-13.5695	1.54561		-9.6099		-2.66437
-11.5907		1.75514	1.81028		-13.4728	1.55285		-9.60056		-2.5195
-11.4951		1.90281	1.96677		-13.433	1.56024		-9.35388		-2.21836
-11.1754		2.00189	1.97829		-12.9718	1.57484		-9.12301		-2.16809
-11.1461		2.01034	1.99658		-12.968	1.57582		-9.03426		-2.07503
-11.0138		2.6351	1.99827		-12.9166	1.58296		-8.76886		-1.93639
-10.8955		3.22247	2.00062		-12.8678	1.59293		-8.69484		-1.84561
-10.8054		3.47174	2.03677		-12.7051	1.59911		-8.52867		-1.65085
-10.4956		3.52616	2.1066		-12.433	1.61908		-8.30611		-1.60223
-10.3974		3.55326	2.28374		-12.1279	1.69812		-8.29559		-1.5011
-10.2679		3.62284	2.31383		-12.0884	1.7534		-8.19558		-0.945213
-10.2417		3.70242	2.42858		-12.0177	1.76246		-8.17775		-0.924939
-10.1853		3.73488	2.52153		-11.9127	1.77176		-8.07446		-0.417122
-10.155		3.90472	2.52847		-11.686	1.78417		-7.95118		-0.378285
-10.1004		4.01692	2.54807		-11.6684	1.79584		-7.88474		-0.0296389
-9.73568		4.07031	2.60756		-11.6661	1.79602		-7.87624		0.203978
-9.40137		4.07391	2.6481		-11.6078	1.80422		-7.58621		0.214144
-9.33783		4.2914	2.66088		-11.4927	1.83178		-7.50005		0.68802
-9.14558		4.3178	2.75374		-11.2875	1.88929		-7.48476		0.79301
-9.1193		4.66982	2.77929		-11.2099	1.97003		-7.05038		0.816555
-8.90794		5.08047	2.8945		-11.0548	1.98591		-7.02212		0.971042
-8.77078		5.37999	2.94919		-10.9932	1.99026		-6.85722		1.07934
-8.58849		6.3018	2.96203		-10.973	2.06943		-6.64275		1.4763
-8.50728		6.4611	2.98657		-10.7039	2.30842		-6.44412		2.37675
-8.30273		7.05452	2.99514		-10.504	2.3112		-6.21878		2.53896
-8.23551		7.28448	3.01815		-10.3717	2.31605		-5.83184		2.74249
-7.94563		7.76826	3.02122		-10.34	2.3471		-5.71518		3.04613
-7.49964		7.86368	3.05973		-10.262	2.38077		-5.60762		3.08241
-7.32585		8.72328	3.11401		-10.1324	2.44694		-5.56363		3.38997
-7.27713		9.17428	3.23952		-9.84849	2.7076		-5.51787		4.35198
-7.01423		9.50772	3.24044		-9.69917	2.73071		-5.22363		5.0568
-6.89471		9.54733	3.25529		-9.62098	2.86764		-5.18935		5.38559
-6.79395		9.70877	3.26809		-9.61805	3.11029		-5.13664		5.9739
-6.51954		9.96122	3.27195		-9.54798	3.22518		-5.07784		6.02013
-6.4728		10.4811	3.28538		-9.24684	3.33408		-5.04651		6.32246
-6.38279		10.5288	3.30151		-9.17792	3.35939		-5.03096		6.73076
-6.38011		10.5489	3.33168		-8.7647	3.51112		-4.61829		7.23609
-6.30018		11.1234	3.3915		-8.70568	3.73173		-4.46392		7.43012
-6.05538		11.3391	3.41513		-8.54456	3.82744		-4.42287		7.4979
-6.00586		11.4316	3.4438		-8.5199	4.27996		-4.22351		7.57136
-5.83519		11.8508	3.49632		-8.40347	4.43683		-3.07367		7.58295
-5.73109		12.007	3.50667		-8.02602	4.48798		-3.04425		7.59982
-4.88937		12.1067	3.51051		-8.01214	4.61429		-2.79468		7.94502
-3.99965		12.1582	3.59109		-7.88338	4.71468		-2.63953		8.02776
-3.92122		12.4281	3.62826		-7.76342	4.75139		-2.50748		8.07128
-3.79271		12.4837	3.63584		-7.57568	4.76321		-2.17937		8.55489
-3.63853		12.5711	3.66304		-7.47623	4.7807		-2.14046		8.6626
-3.02296		12.6021	3.69258		-7.39743	5.13549		-1.72707		8.84141
-2.39727		12.7403	3.78094		-7.38864	5.17197		-1.2718		8.91766
-2.04027		12.829	3.79499		-7.23393	6.07265		-1.05225		9.25012
-2.01874		12.8543	3.84602		-7.21003	6.17903		-1.03394		9.442
-2.00348		13.1407	3.86417		-6.48147	7.2688		-0.92003		9.86141
-1.06889		13.1425	3.90266		-6.19178	7.95444		-0.387368		10.0868
-0.826004		13.939	3.95362		-6.09382	7.97969		-0.328799		10.1278
-0.466811		14.3569	4.06054		-5.94898	8.19077		-0.129136		10.4981
-0.254835		14.3924	4.08239		-5.90745	8.3525		0.209973		11.148
1.0055		14.5473	4.09178		-5.86047	8.47623		0.491185		11.2722
1.7051		14.5607	4.15577		-5.41441	8.61841		1.96884		11.4538
1.91799		14.8834	4.29977		-5.1255	8.80615		2.66066		11.4853
2.16759		15.5107	4.34422		-5.12174	8.88987		2.68686		11.4944
3.24371		16.1597	4.42071		-5.11456	9.16565		3.09433		11.6327
3.61037		16.3534	4.49498		-3.81841	9.23815		3.32291		11.8125
4.62184		16.3536	4.7724		-3.74791	9.45302		3.54394		12.0639
4.67579		17.0871	4.79706		-3.61769	9.6575		3.64071		12.1589
5.04259		18.4496	4.91189		-2.99432	9.97061		4.66399		12.8368
5.6664		18.6324	5.14007		-2.77986	10.0558		4.727		13.5257
6.5176		18.6671	5.25874		-1.84786	10.2915		4.7295		13.913
6.66088		19.7926	5.28459		-1.31865	10.5348		4.84459		14.0757
6.69273		20.1677	5.92672		-1.22782	10.6396		5.27678		14.1128
7.2326		20.5868	5.93615		0.0633117	10.839		6.64563		14.2217
8.35298		20.7905	6.11891		0.0712808	11.1301		6.79088		14.4886
8.6977		21.2088	6.20777		0.720582	11.1757		7.33432		14.883
8.70562		21.4	6.24269		1.10208	11.2429		7.59427		15.2522
9.14911		21.6815	6.42454		1.43826	11.3605		9.5513		15.4312
9.48478		21.9157	6.85205		2.01565	11.3638		9.8533		17.3352
9.77499		22.5485	8.56311		2.20116	12.1303		10.3391		17.5312
10.2611		23.7046	8.86384		2.3389	12.3315		10.3906		18.109
10.5287		24.6476	9.29066		2.40933	13.8994		10.9439		18.3568
12.3108		24.8145	9.30264		3.05954	14.003		11.1604		18.5461
13.6862		24.9931	9.3728		3.8779	14.0559		12.9662		19.6876
13.7596		26.0366	10.0121		4.83371	14.4025		13.3401		19.9323
13.9419		26.4673	10.6616		8.15587	14.4511		14.1063		24.09
17.1567		26.8468	11.016		11.7719	14.5725		14.3785		24.8607
17.2564		28.9963	12.5012		15.0754	15.2161		17.7272		26.6885
21.3267		29.5972	13.6513		15.8573	15.6533		19.1199		33.5891
